# Machine Learning based Genome-Wide Association Studies for Uncovering QTL Underlying Soybean Yield and its Components

Mohsen Yoosefzadeh-Najafabadi,<sup>1</sup> Sepideh Torabi,<sup>1</sup> Davoud Torkamaneh,<sup>2</sup> Dan Tulpan,<sup>3</sup>  
Istvan Rajcan,<sup>1</sup> and Milad Eskandari<sup>1\*</sup>

<sup>1</sup> Department of Plant Agriculture, University of Guelph, Guelph, ON N1G 2W1, Canada

<sup>2</sup> Département de Phytologie, Université Laval, Québec City, QC G1V 0A6, Canada

<sup>3</sup> Department of Animal Biosciences, University of Guelph, Guelph, ON N1G 2W1,  
Canada

\*Corresponding author: Email: [meskanda@uoguelph.ca](mailto:meskanda@uoguelph.ca)

## Highlight

Implementing sophisticated mathematical approaches such as machine learning algorithms in GWAS can simultaneously consider a wide range of interconnected biological processes and mechanisms that shape the phenotype of complex traits such as yield and its components in soybean.

## Abstract

Genome-wide association study (GWAS) is currently one of the important approaches for discovering quantitative trait loci (QTL) associated with traits of interest. However, insufficient statistical power is the limiting factor in current conventional GWAS methods for characterizing quantitative traits, especially in narrow genetic bases plants such as soybean. In this study, we evaluated the potential use of machine learning (ML) algorithms such as support vector machine (SVR) and random forest (RF) in GWAS, compared with two conventional methods of mixed linear models (MLM) and fixed and random model circulating probability unification (FarmCPU), for identifying QTL associated with soybean yield components. In this study, important soybean yield component traits, including the number of reproductive nodes (RNP), non-reproductive nodes (NRNP), total nodes (NP), and total pods (PP) per plant along with yield and maturity were assessed using 227 soybean genotypes evaluated across four environments. Our results indicated SVR-mediated GWAS outperformed RF, MLM and FarmCPU in discovering the most relevant QTL associated with the traits, supported by the functional annotation of candidate gene analyses. This study for the first time demonstrated the potential

31 benefit of using sophisticated mathematical approaches such as ML algorithms in GWAS for  
32 identifying QTL suitable for genomic-based breeding programs.

33 **Keywords:** Data-driven Models; FarmCPU; Genome-wide association study; MLM; Soybean  
34 Breeding; Support vector machine.

## 35 **Introduction**

36 Soybean (*Glycine max* [L.] Merr.) is known as one of the most important legume crops with  
37 substantial economic value (Rebilas *et al.*, 2020). Soybean is widely used for food, feed, fiber,  
38 biodiesel, and green manure (Temesgen and Assefa, 2020). Despite the importance of genetic  
39 improvement in soybean yield, the soybean germplasm has in general a narrow genetic basis,  
40 especially within North American germplasm, which has resulted in limited enhancement of the  
41 genetic gain, historically (Xavier and Rainey, 2020). Therefore, there is a great need for  
42 analytical breeding to explore the optimum genetic potential of soybean (Mangena, 2020; Suhre  
43 *et al.*, 2014).

44 Analytical breeding strategy as an alternate breeding approach requires a better understanding of  
45 the factors, or individual traits, responsible for the development, growth, and yield (Richards,  
46 1982). This strategy considers highly correlated secondary traits with the trait of interest as the  
47 selection criteria that can make empirical selection more efficient for improving the genetic gain  
48 (Reynolds, 2001; Richards, 1982; Xavier and Rainey, 2020). The application of the analytical  
49 approaches in plant breeding programs has been limited due mainly to lack of sufficient  
50 resources, as they are time and labor-consuming (Richards, 1982; Xavier *et al.*, 2018). Therefore,  
51 breeders are restricted to evaluating secondary traits in a small number of genotypes, which  
52 results in the limitation of the knowledge in the genome-to-phenome analysis process (Kahlon *et*  
53 *al.*, 2011; Nico *et al.*, 2019; Robinson *et al.*, 2009).

54 Yield potential in soybean is mainly determined by the following yield component traits: the  
55 total number of pods, nodes, reproductive nodes, non-reproductive nodes, and pods per plant  
56 (Pedersen and Lauer, 2004; Reynolds, 2001; Xavier *et al.*, 2018; Xavier and Rainey, 2020;  
57 Yoosefzadeh-Najafabadi *et al.*, 2021b). Of these, the total number of nodes and pods play more  
58 important roles in seed yield production than other yield components (Robinson *et al.*, 2009;  
59 Yoosefzadeh-Najafabadi *et al.*, 2021b). Several studies reported a steady increase in the total  
60 number of nodes and the total number of pods in soybean cultivars from 1920 to 2010 (Kahlon *et*  
61 *al.*, 2011; Suhre *et al.*, 2014; Xavier and Rainey, 2020). These findings may highlight the  
62 importance and potential use of the phenotypic and genotypic information on these traits, along  
63 with yield per se, as selection criteria in cultivar development programs (Ma *et al.*, 2001).

64 Genetic studies of soybean yield component traits can accelerate the breeding process more  
65 accurately (Xavier and Rainey, 2020). Genome-Wide Association Studies (GWAS), as one of  
66 the common genetic approaches, can be implemented on diverse populations to detect the  
67 quantitative trait loci (QTL) associated with the soybean yield component traits (Kaler *et al.*,  
68 2020). Associated QTL can be used for screening large soybean populations in a short time with  
69 less elaborate efforts (Xavier *et al.*, 2018). Several GWAS algorithms have been developed for  
70 genetic studies, such as mixed linear models (MLM), multiple loci linear mixed model  
71 (MLMM), and fixed and random model circulating probability unification (FarmCPU) (Kaler *et*

72 *al.*, 2020). However, due to the narrow genetic base of some plant species, including soybean,  
73 the conventional approaches may not have enough statistical power to detect reliable QTL (Kaler  
74 *et al.*, 2020; Mohammadi *et al.*, 2020; Xavier and Rainey, 2020). Therefore, the development of  
75 more sophisticated statistical methods is required in order to establish effective GWAS methods  
76 for plant species with a narrow genetic base.

77 Current GWAS methods are based on the conventional statistical methods that are useful for  
78 studying less complex traits in plant species with broader genetic bases (Lipka *et al.*, 2015;  
79 Pasaniuc and Price, 2017). Machine learning (ML) algorithms as powerful and reliable  
80 mathematical methods can be considered as an alternative to conventional statistical methods for  
81 performing GWAS, which are efficient for studying more complex traits in plants with narrow  
82 genetic base (Xavier and Rainey, 2020). Recently, the use of ML algorithms has been reported in  
83 different areas such as plant science (Hesami *et al.*, 2020; Yoosefzadeh-Najafabadi *et al.*, 2021a),  
84 animal science (Tulpan, 2020), human science (Chen and Verghese, 2020), engineering (Kim *et al.*,  
85 2020), and computer science (Jordan and Mitchell, 2015). The application of ML algorithms  
86 in GWAS was previously investigated in humans by Szymczak *et al.* (2009). They explained a  
87 possible use of different ML algorithms such as artificial neural networks (ANN), Bayesian  
88 network analysis (BNA), and random forests (RF) in GWAS for human disease studies  
89 (Szymczak *et al.*, 2009). One of the most common used ML algorithms is RF developed by  
90 Breiman (2001), which generates a series of trees from the independent samples for better  
91 prediction performance (Meinshausen, 2006). The latter algorithm has been widely used in plant  
92 genomics (Ogutu *et al.*, 2011), phenomics (Yoosefzadeh-Najafabadi *et al.*, 2021a), proteomics  
93 (Jamil *et al.*, 2020), and metabolomics (Sun *et al.*, 2020).

94 The first and only use of the RF-mediated GWAS in soybean, for detecting the genomics  
95 association in soybean yield component traits, was reported by Xavier and Rainey (2020).  
96 Support vector machine (SVM) is another common algorithm that can detect behavior and  
97 patterns of nonlinear relationships (Auria and Moro, 2008; Hesami and Jones, 2020; Su *et al.*,  
98 2017). Theoretically, SVM should have high performance due to the use of structural risk  
99 minimization instead of the empirical risk minimization inductive principles (Belayneh *et al.*,  
100 2014; Yoosefzadeh-Najafabadi *et al.*, 2021a). There is a significant number of reports on the  
101 successful using of SVM in prediction problems (Denton and Salleb-Aouissi, 2020; Duan *et al.*,  
102 2005; Hesami *et al.*, 2020; Tulpan, 2020; Yoosefzadeh-Najafabadi *et al.*, 2021a). Support vector  
103 regression (SVR) is known as the regression version of SVM that commonly used for continuous  
104 dataset. There are also reports on the successful use of SVR for addressing plant prediction  
105 problems (Awad and Khanna, 2015). However, the possible use of SVR in GWAS is still  
106 unexplored in plant science area.

107 In this study we aimed to: (1) gain a better understanding of the genetic relationships between  
108 soybean yield and its component traits, and (2) investigate the potential use of RF and SVM  
109 algorithms in GWAS for discovering QTL underlying soybean yield components as compared to  
110 conventional GWAS methods of MLM and FarmCPU. The results of this study will help  
111 soybean breeders to have a better perspective of exploiting ML algorithms in GWAS studies, and  
112 may offer them new genomic tools for screening high yielding genotypes with improved genetic  
113 gain based on genomic regions associated with yield components.

## 114 **Materials and Methods**

### 115 **Population and experimental design**

116 An GWAS panel of 250 soybean genotypes was grown at the University of Guelph, Ridgetown  
117 Campus in two locations, Palmyra (42°25'50.1"N 81°45'06.9"W, 195 m above sea level) and  
118 Ridgetown (42°27'14.8"N 81°52'48.0"W, 200m above sea level) in Ontario, Canada, in two  
119 consecutive years, 2018 and 2019. The panel used in this study consisted of the main germplasm  
120 of the soybean breeding program at the University of Guelph, Ridgetown Campus, that has been  
121 established over 35 years for cultivar development and genetic studies. The randomized  
122 complete block design (RCBD) with two replications was used for all four environments. In  
123 general, there were 500 and 1000 research plots per environment and year, respectively. Each  
124 plot consisted of five 4.2 m long rows with 57 seeds per m<sup>2</sup> seeding rate.

### 125 **Phenotyping**

126 In this experiment, soybean seed yield (t ha<sup>-1</sup> at 13% moisture) for each plot was estimated by  
127 harvesting three middle rows. Soybean seed yield components, including the total number of  
128 reproductive nodes per plant (RNP), the total number of non-reproductive nodes per plant  
129 (NRNP), the total nodes per plant (NP), and the total number of pods per plant (PP), were  
130 measured using 10 randomly selected plants from each plot. The maturity was recorded as the  
131 number of days from planting to physiological maturity (R7, (Fehr and Caviness, 1971) for each  
132 genotype.

### 133 **Genotyping**

134 Young trifoliolate leaf tissue for each soybean genotype from the first replication of the trail at the  
135 Ridgetown in 2018, were collected and in a 2 mL screw-cap tube. The leaf samples were freeze-  
136 dried for 72 hours, using the Savant ModulyoD Thermoquest (Savant Instruments, Holbrook,  
137 NY). By using the DNA Extraction Kit (SIGMA®, Saint Louis, MO), DNA was extracted for  
138 soybean genotypes, and the quantity of DNAs was checked via Qubit® 2.0 fluorometer  
139 (Invitrogen, Carlsbad, CA). For genotyping-by-sequencing (GBS), DNA samples were sent to  
140 Plate-forme D'analyses Génomiques at Université Laval (Laval, Quebec, Canada). The GWAS  
141 panel was genotyped via a GBS protocol based on the enzymatic digestion with *ApeKI* (Sonah *et*  
142 *al.*, 2013). Single-nucleotide polymorphisms (SNPs) were called by the Fast GBS pipeline  
143 (Torkamaneh *et al.*, 2020), using Gmax\_275\_v2 reference genome. Markov model was used to  
144 impute the missing loci, and SNPs with a minor allele frequency (MAF) less than 0.05 were  
145 removed below the threshold. In total, after checking the quality of reading sequence and  
146 removing SNPs with more than 50% heterozygosity, 23 genotypes were eliminated from the  
147 experiment and 17,958 high-quality SNPs from 227 soybean genotypes used for genetic analysis.

### 148 **Statistical analyses**

149 The best linear unbiased prediction (BLUP) as one of the common linear mixed models  
150 (Goldberger, 1962) was used to estimate the genetic values of each soybean genotype. Also, R  
151 package *lme4* (Bates *et al.*, 2014) was used to analyze yield and yield components with  
152 'environment' as a fixed effect and 'genotype' as a random effect. To control for the possible

153 soil heterogeneity among the plots within a given block and reduce the associated experimental  
154 errors, nearest-neighbor analyses (NNA) was used as one of the common error control methods  
155 (Bowley, 1999; Katsileros *et al.*, 2015; Stroup and Mulitze, 1991). Outliers were determined in  
156 the raw dataset based on the protocols proposed by Bowley (1999) and treated the same as  
157 missing data points in the analysis. Overall, the following statistical model was used in this  
158 study:

$$159 \quad Y_{ij} = \mu + f(s) + G_i + E_j + GE_{ij} + \varepsilon_{ij}, i = 1, \dots, k; j = 1, \dots, n \quad (\text{Eq 5.1})$$

160 Where  $Y_{ij}$  stands for the trait of interest (soybean seed yield and yield component traits) as a  
161 function of an intercept  $\mu$ ,  $f(s)$  stands for the spatial covariate,  $G_i$  is the random genotype effect,  
162  $E_j$  stands for the fixed environment effect,  $GE_{ij}$  is the genotype x environment interaction effect,  
163 and  $\varepsilon_{ij}$  stands for the residual effect.

164 The heritability was calculated for soybean seed yield and yield components using *lme4* open-  
165 source R package (Bates *et al.*, 2007) based on the following equation:

$$166 \quad H^2 = \frac{\sigma_G^2}{\sigma_G^2 + \sigma_E^2} \quad (\text{Eq 5.2})$$

167 where  $\sigma_G^2$  stands for the genotypic variance, and  $\sigma_E^2$  is the environmental variance.

## 168 **Analysis of population structure**

169 A total of 17,958 high-quality SNPs from 227 soybean genotypes were used to conduct  
170 population structure analysis using fastSTRUCTURE (Raj *et al.*, 2014). Five runs were  
171 conducted for K set from 1 and 15 to estimate the most appropriate number of subpopulations by  
172 using the K tool from the fastSTRUCTURE software.

## 173 **Association studies**

174 Since different GWAS methods may capture different genomic regions (Yang *et al.*, 2018).  
175 Therefore, MLM and FarmCPU (two most common GWAS methods) and RF and SVM (two  
176 most common machine learning algorithms) were used in this study. MLM and FarmCPU were  
177 implemented by using *GAPIT* package (Lipka *et al.*, 2012), and RF, as well as SVM, were  
178 conducted through the *Caret* package (Kuhn *et al.*, 2020) in R software version 3.6.1. A brief  
179 description of each of the GWAS methods is provided below:

180 **Mixed Linear Model (MLM):** This GWAS is based on the likelihood ratio between the full  
181 model, consisting of the marker of interest, and the reduced model, which is known as the model  
182 without the marker of interest (Wen *et al.*, 2018).

183 **Fixed and random model circulating probability unification (FarmCPU):** This GWAS takes  
184 the advantages of using MLM as the random model, and stepwise regression as the fixed model  
185 iteratively (Liu *et al.*, 2016). False discovery rate (FDR) is used for setting the threshold both in  
186 the FarmCPU and MLM models (Benjamini and Hochberg, 1995).

187 **Random Forest (RF):** This machine-learning algorithm was first implemented by Xavier and  
188 Rainey (2020) in a soybean GWAS study. This method is known as the powerful non-parametric  
189 regression approach that is derived from aggregating the bootstrapping in various decision trees  
190 (Breiman, 2001). In this experiment, a 1000-set of decision trees constructed the forest, and the  
191 GWAS analysis was done by measuring the importance of each feature (Botta *et al.*, 2014),  
192 which was an SNP in this study.

193 **Support vector regression (SVR):** This machine learning algorithm is known as one of the  
194 common supervised learning methods in prediction problems (Cortes and Vapnik, 1995). This  
195 algorithm is based on constructing a set of hyperplanes that can be useful in regression problems  
196 (Fletcher, 2009). The association statistics in this algorithm can be achieved by estimating the  
197 feature importance that was previously proposed by Weston *et al.* (2001). In this experiment,  
198 SNP markers were selected as inputs, and the traits were selected as target variables for  
199 estimating the feature importance.

## 200 **Variable Importance measurement**

201 As one of the common indices for tree-based algorithms, the impurity index was chosen as the  
202 metric of the feature importance for the RF algorithm. Regarding the SVR algorithm, the  
203 variable importance method for SVR Weston *et al.* (2001) was implemented in this dataset. For  
204 both algorithms, the importance of each SNP was scaled based on 0 to 100 percent scale. Since  
205 there is no confirmed way of defining the significant threshold in the tested algorithms, the  
206 global empirical threshold that provides the empirical distribution of the null hypothesis  
207 (Churchill and Doerge, 1994; Doerge and Churchill, 1996) was used for establishing threshold in  
208 this study. The global empirical threshold was estimated based on fitting the ML algorithm,  
209 storing the highest variable importance, repeating 1000 times, and select the SNPs based on  
210  $\alpha=0.05$ .

## 211 **Data-driven model processes**

212 In order to estimate the feature importance in RF and SVR algorithms, a five-fold cross-  
213 validation strategy (Siegmann and Jarmer, 2015) with ten repetitions was applied on the dataset.  
214 All of the tested machine learning algorithms were optimized for their parameters for this dataset  
215 accordingly.

## 216 **Functional annotation of candidate SNPs**

217 For each tested GWAS model, the flanking regions of each QTL was determined using LD decay  
218 distance (Fig.1), and then potential candidate genes were retrieved using the *G. max* cv. William  
219 82 reference genome, gene models 2.0 in SoyBase (<https://www.soybase.org>). After listing  
220 potential candidate genes in defined windows around each significant SNP, at the peak of each  
221 QTL, Gene Ontology annotation, GO term enrichment (<https://www.soybase.org>), and the report  
222 from previous studies were used as the criteria to select and report the most relevant candidate  
223 genes associated with the identified QTL. The Electronic Fluorescent Pictograph (eFP) browser  
224 for soybean ([www.bar.utoronto.ca](http://www.bar.utoronto.ca)) was also used to generate additional information such as  
225 tissue- and developmental-stage dependent expression (based on transcriptomic data from  
226 Severin *et al.* (2010)) for the identified candidate genes.

## 227 **Visualization**

228 All of the visualizations in this study were conducted using the *ggplot2* package (Wickham,  
229 2011) in R version 3.6.1 software and Microsoft Excel software (2016).

## 230 **Results**

### 231 **Phenotyping evaluations**

232 The tested GWAS panel of 227 soybean genotypes showed significant variations among the  
233 genotypes for seed yield, maturity, and yield component traits. The distribution of the phenotypic  
234 measures for the traits across the four environments is presented in Fig. 2. The highest  
235 heritability was observed for maturity with an estimate of 0.78 followed by 0.34, 0.33, 0.31, and  
236 0.30 for NP, RNP, NRNP, and PP, respectively (Fig. 2). The lowest heritability was estimated  
237 for yield with a value of 0.24 (Fig. 2). Soybean seed yield and PP showed the highest variability  
238 across the environments (Fig. 2).

239 The linear correlations among all the measured traits were estimated using the coefficients of  
240 correlation ( $r$ ). Based on the results (Fig. 3), all traits were positively correlated with each other,  
241 except the NRNP that was negatively associated with yield, maturity, RNP, NP, and PP. NP  
242 showed the highest correlation with the RNP ( $r= 0.97$ ) and NRNP ( $r= -0.63$ ). RNP had the  
243 highest correlation ( $r=0.86$ ) with yield among all the tested yield components (Fig. 3).

### 244 **Genotyping evaluations**

245 For the tested GWAS panel, high-quality SNPs were obtained from 210M single-end Ion Torrent  
246 reads that were proceeded with Fast-GBS.v2. From a total of 40,712 SNPs, 17,958 SNPs were  
247 polymorphic and mapped to 20 soybean chromosomes. The minimum and maximum number of  
248 SNPs were 403 and 1780 on chromosomes 11 and 18, respectively. Overall, the average number  
249 of SNPs across all the 20 chromosomes was 898, with the mean density of one SNP for every  
250 0.12 cM across the genome.

### 251 **Population structure and kinship**

252 The structure profile for the tested population is presented in Fig. 4. The result of genotypic  
253 evaluations suggested that the tested GWAS panel was composed of four to seven  
254 subpopulations. Therefore, we chose to conduct the structure analysis using  $K=7$  as the  
255 appropriate  $K$  for the structure profile of the tested GWAS panel (Fig. 4). In order to reduce the  
256 confounding, the kinship was also estimated between genotypes of the GWAS panel.

### 257 **GWAS analysis**

258 The average value for soybean maturity in the tested GWAS panel was 106 days with a standard  
259 deviation of 5 days (Fig. 3). Association analysis by the MLM method identified nine associated  
260 SNP markers located on chromosomes 2 and 19 (Fig. 5A). Using FarmCPU, a total of nine  
261 associated SNP markers were located on chromosomes 2, 19, and 20 (Fig. 5A). By using the RF  
262 method, the total of three SNP markers on chromosomes 3, 16, and 17 were associated with the

263 soybean maturity, whereas SVR-mediated GWAS detected 11 associated SNP markers located  
264 on chromosomes 2, 6, 10, 16, 19, and 20 (Fig. 5A).

265 SVR-mediated GWAS detected five QTL directly related to the reproductive period and R8 full  
266 maturity (Table 1). The average soybean seed yield in the GWAS panel was 3.5 t ha<sup>-1</sup> with a  
267 standard deviation of 0.45 (Fig. 3). Using MLM, FarmCPU, RF, and SVR approach, we  
268 identified two, three, five, and 18 SNP markers associated with the yield, respectively (Fig. 5B).  
269 The SNP markers identified by MLM and FarmCPU were located on chromosomes 6 and 8.  
270 Using the RF-mediated GWAS method, associated SNP markers were located on chromosomes  
271 4, 7, 12, and 17. By using the SVR-mediated GWAS method, the SNP markers were located on  
272 chromosomes 3, 4, 6, 7, 15, 19, and 20 (Fig. 5B). In SVR-mediated GWAS, the identified QTL  
273 were co-localized with eight previously reported related QTL such as seed yield, seed weight,  
274 and seed set (Table 2). However, other tested GWAS methods could not co-localized with any  
275 QTL associated with seed yield (Table 2).

276 The average NP in the tested GWAS panel was 15.21 nodes with a standard deviation of 0.77  
277 nodes (Fig. 3). By using the MLM and FarmCPU methods, one and two associated SNP markers  
278 were detected, respectively (Fig. 6A). Four and ten associated SNP markers were detected by NP  
279 using RF and SVR methods, respectively. SVR-mediated GWAS was the only method that were  
280 co-localized with three previously reported NP-related QTL (Table 3). The average NRNP was  
281 3.33 nodes with a standard deviation of 0.28 nodes (Fig. 3). A total of two, three, five, and ten  
282 associated SNP markers were detected using the MLM, FarmCPU, RF, and SVR methods,  
283 respectively (Fig. 6B). The detected SNP markers using the SVR method were located on  
284 chromosomes 4, 7, 18, 19, and 20, whereas SNP markers identified through RF were located on  
285 chromosomes 1, 4, 7, 18, and 19 (Fig. 6B). Chromosomes number 4, 8, and 15 were identified as  
286 carrying SNP markers with NRNP using FarmCPU. The MLM method identified SNP markers  
287 located on chromosomes 8 and 15, which most of the detected QTL co-localized with previously  
288 reported QTL related to seed weight, seed protein, water use efficiency, first flower, and soybean  
289 cyst nematode (Table 4).

290 The average RNP was 11.89 nodes with a standard deviation of 0.98 nodes (Fig. 3). Based on the  
291 results of MLM and FarmCPU methods, four associated SNP markers with RNP were located on  
292 chromosomes 8 and 19. Using the RF method, four associated SNP markers were identified on  
293 chromosomes 8, 9, 15, and 20. Using the SVR method, 11 SNP markers were associated with  
294 RNP located on chromosomes 4, 7, 8, 15, 18, 19, and 20 (Fig. 7A). Regardless of the type of  
295 GWAS methods used in this study, we found SNP markers associated with the trait on  
296 chromosome 8. The position of the associated SNP marker on chromosome 8 was identical both  
297 in SVR and RF (462.3 Kbp) and MLM and FarmCPU (481.6 Kbp). The list of detected QTL for  
298 RNP is presented in Table 5. The average value for PP in the tested GWAS panel was 45.02 pods  
299 with a standard deviation of 8.54 pods. We did not detect any SNP marker associated with PP  
300 using the MLM and FarmCPU methods. However, by using the RF method, four SNP markers  
301 were found to be associated with PP and located on chromosomes 7, 10, 19, and 20 (Fig. 7B).  
302 Twelve associated SNP markers were found by SVR that were located on chromosomes 6, 9, 10,  
303 11, 15, 18, and 19 (Fig. 7B). The GWAS of chromosome 10 with PP were found both in RF and  
304 SVR with 4.6 cM distance far from each other. In PP, MLM and FarmCPU did not detect any



305 related QTL for this trait, while SVR-mediated GWAS was identified seven QTL directly related  
306 to the pod number (Table 6).

### 307 **Identification of candidate genes within QTL**

308 According to the flanking regions of each QTL which was determined using LD decay distance,  
309 150-kbp upstream and downstream of each SNP's peak were considered to identify potential  
310 candidate genes (Fig. 1). Candidate genes were extracted for each significant peak SNP with  
311 high allelic effect and based on the gene annotation, enrichment tools and previous studies  
312 (Table S1). For maturity, three peak SNPs (Chr2\_695362, Chr2\_720134, and Chr19\_47513536)  
313 had the highest allelic effect than other detected peak SNPs (Fig. 8A). On the basis of the gene  
314 annotation and expression within QTL, *Glyma.02g006500* (GO:0015996) and *Glyma.19g224200*  
315 (GO:0010201) were identified as the strong candidate genes for maturity, which encode  
316 chlorophyll catabolic process and phytochrome A (PHYA) related genes, respectively.  
317 *Glyma.02g006500* (GO:0015996) was exactly detected in the peak SNP position of  
318 Chr2\_695362, whereas *Glyma.19g224200* (GO:0010201) was 119 Kbp far from the detected  
319 peak SNP at Chr19\_47513536. In yield, the peak SNP with the position of Chr7\_1032587 had  
320 the highest allelic effect in comparison with other detected peak SNPs (Fig. 8B). Within a 77  
321 Kbp above from the detected peak SNP (Chr7\_1032587), *Glyma.07G014100* (GO:0010817) was  
322 identified, which encodes the regulation of hormone levels, as the strongest candidate genes in  
323 yield. For NP, two peak SNPs (Chr7\_1032587 and Chr7\_1092403) had the highest allelic effect  
324 among all detected peak SNPs (Fig. 8C). SNP peak position of Chr7\_1032587 was detected in  
325 common for yield, NP, and NRNP. *Glyma.07G205500* (GO:0009693) and *Glyma.08G065300*  
326 (GO:0042546) were detected as the strongest candidate genes both in NP and NRNP, which  
327 encode UBPI-associated protein 2C and cell wall biogenesis, respectively. Both detected gene  
328 candidates were exactly at the associated peak SNPs at Chr7\_1032587 and Chr8\_5005929 (Fig.  
329 8D). Regarding peak SNPs associated with RNP, the highest allelic effects were found in peak  
330 SNPs of Chr9\_40285014 and Chr15\_34958361 (Fig. 8E). *Glyma.15G214600* (GO:0009920) and  
331 *Glyma.15G214700* (GO:0009910), which encode cell plate formation involved in plant-type cell  
332 wall biogenesis and acetyl-CoA biosynthetic process, as strong candidate genes in NRNP.  
333 *Glyma.15G214600* (GO:0009920) and *Glyma.15G214700* (GO:0009910) were 127 and 90 Kbp  
334 far from the detected peak SNP at Chr15\_3495836, respectively. In PP, the highest allelic effects  
335 were found in peak SNPs at Chr7\_15331676, Chr11\_5245870, and Chr18\_55469601 (Fig. 8F).  
336 *Glyma.07G128100* (GO:0009909) was the strongest candidate genes for PP, which encodes  
337 regulation of flower development. *Glyma.07G128100* (GO:0009909) was detected exactly in the  
338 peak SNP position of Chr7\_15331676.

### 339 **Discussion**

340 One of the objectives of this study was to gain a better understanding of the roles of soybean  
341 yield component traits in the production of total seed yield and how these traits can be used for  
342 facilitating the development of high-yielding soybeans. The genetic dissection of soybean yield  
343 component traits in order to develop genetic and genomics toolkits can be useful for designing  
344 breeding population and selection criteria aiming at improving yield genetic gains in new  
345 cultivars (Cooper *et al.*, 2009; Hu *et al.*, 2020; Xavier and Rainey, 2020). For this aim, a wide  
346 range of analyses, including Pearson correlation, normality and distribution plots, GWAS both in

347 combined and separate environments, and functional annotation of candidate genes and QTL,  
348 were performed in this study. The collective evaluation of the mentioned analysis contributes to  
349 building the wide perspectives of the genetic architecture of the soybean yield component traits.  
350 One of the important factors for genetic studies is to evaluate the phenotypic variation within  
351 genotypes and environments. High phenotypic variation was observed for yield and PP, while  
352 maturity and NP had the lowest phenotypic variation across the tested environments. These  
353 findings are in line with the results of previous research on yield component traits (Kahlon and  
354 Board, 2012; Xavier and Rainey, 2020). The heritability and correlation analyses showed that NP  
355 had the highest heritability and significant linear correlations with RNP and PP. Also, PP had the  
356 highest correlation with yield among all the tested soybean yield components. The number of  
357 nodes and pods in soybean are known as the two of the key soybean yield components that play  
358 an important role in determining the final soybean seed yield (Herbert and Litchfield, 1982;  
359 Kahlon and Board, 2012; Xavier and Rainey, 2020). However, studies showed the low  
360 heritability rates for soybean yield components, especially NP and PP (KUSWANTORO, 2017;  
361 Sulistyono and Sari, 2018; Xavier *et al.*, 2016a; Xavier and Rainey, 2020). The nature of these  
362 traits can explain low heritability rates as they are mostly affected by environmental factors  
363 (Price and Schluter, 1991). Although heritability indicates the strength of the relationship  
364 between phenotype and genetic variation of the particular trait, it does not indicate the value of  
365 the trait for genetic study (Cassell, 2009). Different low heritable traits are highly correlated with  
366 significant economic traits (Cassell, 2009). In soybean, yield can be considered as the most  
367 important economic trait that is highly determined by yield components. Therefore, any genetic  
368 and environmental studies around yield components can open the possibility of overall yield  
369 improvement in major crops such as soybean.

370 GWAS is known as one of the most important genetic toolkits for detecting QTL associated with  
371 quantitative traits (Kaler *et al.*, 2020). There are several statistical methods implemented in GWAS  
372 for improving the detection of associated SNP markers with the trait of interest. While  
373 conventional GWAS are appropriate approaches for detecting SNP markers with large effects on  
374 complex traits, they are, however, underpowered for the simultaneous consideration of a wide  
375 range of interconnected biological processes and mechanisms that shape the phenotype of  
376 complex traits (Lee *et al.*, 2020). Therefore, using variable importance values in ML algorithms  
377 for identifying SNP-trait associations may improve the power of ML-mediated GWAS for  
378 discovering variant-trait association with higher resolution (Szymczak *et al.*, 2009). The variable  
379 importance methods based on linear and logistic regressions, support vector machines, and  
380 random forests are well established in the literature (Grömping, 2009; Williamson *et al.*, 2020;  
381 Wu and Liu, 2009; Yoosefzadeh-Najafabadi *et al.*, 2021a). Among all the tested GWAS methods  
382 in this study, SVR-mediated GWAS was the best method to detect SNP markers with high allelic  
383 effects associated with the tested traits. The advantage of SVR-mediated GWAS over  
384 conventional GWAS models can be explained by the presence of a nonlinear relationship  
385 between input and output variables, which is used to build an algorithm with accurate prediction  
386 ability (Kaneko, 2020). Therefore, genomic regions could be better detected by SVR-mediated  
387 GWAS because of its ability to consider the interaction effects between SNPs rather than  $p$ -  
388 values for individual SNP-trait GWAS tests.

389 None of the detected QTL by MLM, FarmCPU, and RF were reported to be associated directly  
390 with soybean maturity. However, using SVR-mediated GWAS, five QTL were detected on

391 chromosomes 16 and 19 specifically related to the soybean maturity. Those QTL were  
392 previously reported by Sonah *et al.* (2015) and Copley *et al.* (2018) in separate studies. Also, the  
393 peak SNP position of Chr19\_47513536 detected by SVR-mediated GWAS had the highest allelic  
394 effect among all the detected SNPs in soybean maturity, which is in line with Sonah *et al.*  
395 (2015). For soybean seed yield, five QTL detected by SVR-mediated GWAS were reported  
396 previously (Copley *et al.*, 2018; Hu *et al.*, 2014), while none of the detected QTL from other  
397 tested GWAS methods was previously reported for this trait. There was no previous study on the  
398 genetic structure of NRNP and RNP, therefore, all the detected QTL in this study are presented  
399 for the first time. For PP, conventional GWAS methods were not able to detect any associated  
400 QTL. However, using SVR-mediated GWAS, a total of seven QTL were detected to be related to  
401 pod numbers based on previous studies (Zhang *et al.*, 2015a). It would be necessary to  
402 emphasize that the average allelic effects of all detected QTL presented in Fig. 8 was not directly  
403 estimated by the tested GWAS methods. The RF and SVR-mediated GWAS methods do not  
404 specifically provide an allele effect therefore, the aim of this study was mostly focused on  
405 detecting the associated genes and QTL underlying the soybean yield, maturity, and yield  
406 components.

407 The results of candidate gene identifications within identified QTL by SVR-mediated GWAS  
408 analyses revealed important information. For example, from all the detected genes using SVR-  
409 mediated GWAS for maturity, candidate gene *Glyma.02g006500* (GO:0015996) is a protein  
410 ABC transporter 1, that is annotated as a chlorophyll catabolic process and located exactly in the  
411 peak SNP position at Chr02\_695362. ATP-binding cassette (ABC) transporter genes play  
412 conspicuous roles in different plant growth and developmental stages by transporting different  
413 phytochemicals across endoplasmic reticulum (ER) membranes (Hwang *et al.*, 2016). Because of  
414 the central roles of ABC transporters in transporting biomolecules such as phytohormones,  
415 metabolites, and lipids, they play important roles in plant growth and development as well as  
416 maturity (Block and Jouhet, 2015; Hwang *et al.*, 2016). Moreover, recent studies revealed that  
417 ER uses fatty acid building blocks made in the chloroplast to synthesize Triacylglycerol (TAG).  
418 Therefore, ABC transporter genes are important for the normal accumulation of Triacylglycerol  
419 (TAG) during the seed-filling stage and maturity (Block and Jouhet, 2015; Kim *et al.*, 2013).  
420 Additionally, *Glyma.19g224200* (GO:0010201) in E3 locus, which was previously discovered by  
421 Buzzell (1971) and molecularly characterized as a phytochrome A (PHYA) gene (Watanabe *et al.*,  
422 2009), was detected through the SVR-mediated GWAS. Phytochromes, through  
423 PHYTOCHROME INTERACTING FACTOR (PIF), regulate the expression of some specific  
424 genes encoding rate-limiting catalytic enzymes of different plant growth regulators (e.g., abscisic  
425 acid, gibberellins, auxin) and, therefore, play crucial roles in plant maturity (Legris *et al.*, 2019).  
426 In addition, PHYB is inactivated after imbibition shade signals, which repress PHYA-dependent  
427 signaling in the embryo that results in the maturity of seeds by preventing germination (Casal,  
428 2013; De Wit *et al.*, 2016). This is obtained by regulating the balance between abscisic acid and  
429 gibberellin. Subsequently, abscisic acid transports from the endosperm to the embryo by ABC  
430 transporter (De Wit *et al.*, 2016).

431 Regarding NRNP, candidate gene *Glyma.07G205500* (GO:0009693- UBP1-associated protein  
432 2C) that annotated as ethylene biosynthetic process was located exactly in the peak SNP position  
433 of *Chr7\_37469678*, was detected by SVR-mediated GWAS. An interaction screen with the  
434 heterogeneous nuclear ribonucleoprotein (hnRNP) results in the production of

435 oligouridylatebinding protein 1 (UBP1)-associated protein (Lambermon *et al.*, 2002). It has been  
436 well documented that this protein plays important roles in several physiological processes such  
437 as responses to abiotic stresses (Li *et al.*, 2002), leaf senescence (Kim *et al.*, 2008), floral  
438 development (Streitner *et al.*, 2008), and chromatin modification (Liu *et al.*, 2007). In addition,  
439 previous studies showed that the production of productive or non-reproductive nodes is  
440 completely accompanied by the upregulation or downregulation of this protein (Bäurle and  
441 Dean, 2008; Na *et al.*, 2015). In addition, *Glyma.08G065300* (GO:0042546- MADS-box  
442 transcription factor) that is associated with cell wall biogenesis, was located in the SNP position  
443 of Chr8\_5005929. The genes of the MADS-box family can be considered as the main regulators  
444 for cell differentiation and organ determination (Lee *et al.*, 2013). The floral organ recognition  
445 MADS-box family has been categorized into A, B, C, D, and E classes. Among these classes,  
446 class E was shown to be associated with reproductive organ development (Hussin *et al.*, 2021).  
447 Indeed, activation or repression of this transcription factor leads to the development of nodes to  
448 productive or non-productive nodes (Ditta *et al.*, 2004; Gao *et al.*, 2010; Liu *et al.*, 2013).

449 Gene expression data provided by Severin *et al.* (2010) noted that 20 candidate genes for PP that  
450 were detected using the SVR-mediated GWAS were expressed in flowers, 1 cm pod (7 DAF),  
451 pod shell (10-13 DAF), pod shell (14-17 DAF) and seeds. In PP, most of the genes detected by  
452 SVR-mediated GWAS are associated with auxin influx carrier or auxin response factors (ARFs),  
453 gibberellin synthesis, and response to brassinosteroid (Lin *et al.*, 2020; Yin *et al.*, 2018). Song *et al.*  
454 (2020) and Li *et al.* (2018a) also reported that some genes related to PP were associated with  
455 embryo development, stamen development, ovule development, cytokinin biosynthesis, and  
456 response gibberellin that we also identified in our study. Soybean seed yield significantly  
457 depends on seed number and seed size (Liu *et al.*, 2010; Rotundo *et al.*, 2009). These two factors  
458 are determined from fertilization to seed maturity. Therefore, soybean seed development can be  
459 divided into three stages or phases: pre-embryo or seed set, embryo growth or seed growth, and  
460 desiccation stages or seed maturation phases (Ruan *et al.*, 2012; Weber *et al.*, 2005). In  
461 Arabidopsis, a complex signaling pathway and regulatory networks, including sugar and  
462 hormonal signaling, transcription factors, and metabolic pathway, have been reported to be  
463 involved in seed development (Le *et al.*, 2010; Orozco-Arroyo *et al.*, 2015). Several key genes  
464 and transcription factors (e.g., LEAFY COTYLEDON 1 (LEC1), LEC2, FUSCA3 (FUS3),  
465 AGAMOUS-LIKE15 (AGL15), ABSCISIC ACID INSENSITIVE 3 (ABI3), YUCCA10  
466 (YUC10), ARFs) have been determined to control several downstream plant growth regulators  
467 pathways to the seed development (Lepiniec *et al.*, 2018; Pelletier *et al.*, 2017; Sun *et al.*, 2010).  
468 Indeed, a high ratio of abscisic acid to gibberellic acid can regulate seed development  
469 (Figueiredo and Köhler, 2018; Wang *et al.*, 2016). The downregulation of FUS3 obtains this  
470 through repressing GA3ox1 and GA3ox2 and activating ABA biosynthesis (Weber *et al.*, 2005).  
471 In soybean, RNA seq analysis for the seed set, embryo growth, and early maturation stages of  
472 developing seeds in two soybeans with contrasting seed size showed cell division and growth  
473 genes, hormone regulation, transcription factors, and metabolic pathway are involved in seed  
474 size and numbers (Du *et al.*, 2017).

## 475 **Conclusion**

476 A better understanding of the genetic architecture of the yield component traits in soybean may  
477 enable breeders to establish more efficient selection strategies for developing high-yielding

478 cultivars with improved genetic gains. Major yield components such as maturity, NP, NRNP,  
479 RNP, and PP play important roles in determining the overall yield production in soybean. This  
480 study verified the importance of those traits, using correlation and distribution analyses, in  
481 determining of the total soybean seed yield. Furthermore, by testing different conventional and  
482 ML-mediated GWAS methods, this study demonstrated the potential benefit of using ML-  
483 mediated methods in GWAS. SVR-mediated GWAS outperformed all the other methods tested  
484 in this study, and therefore, it is recommended as an alternative to conventional GWAS methods  
485 with a greater power for detecting genomic regions associated with complex traits such as yield  
486 and its components in soybean, and possibly other crop species. To the best of our knowledge,  
487 this study is the first attempt in which SVR was used for GWAS analyses in plants. In order to  
488 verify the causal relationship between identified QTL and the target phenotypic traits, we  
489 identified candidate genes within each QTL using gene annotation procedures and information.  
490 The results demonstrated the efficiency of SVR-mediated GWAS in detecting reliable QTL that  
491 can be used in marker-assisted selection. Nevertheless, further investigation is recommended to  
492 confirm the efficiency of SVR-mediated GWAS in detecting associated genomic regions in other  
493 plant species.

#### 494 **Supplementary Data**

495 **Table S1** The full list of detected genes using different GWAS methods for soybean seed yield,  
496 maturity, and yield component traits.

#### 497 **Acknowledgments**

498 The authors are grateful to the past and current members of Eskandari laboratory at the  
499 University of Guelph, Ridgetown, Bryan Stirling, John Kobler, and Robert Brandt for their  
500 technical support. We would like to thank Maryam Vazin and Mohsen Hesami for their  
501 assistance with the field data collection and reviewing the manuscript, respectively.

#### 502 **Author Contribution**

503 ME conceptualized, designed and directed the experiments. MY-N performed the experiments,  
504 modeled, summed up, and wrote the manuscript. ST participated in candidate gene analyses; DT,  
505 DTOR, ST, IR, and ME revised the manuscript and validated the results. All authors have read  
506 and approved the final manuscript.

#### 507 **Data Availability Statement**

508 The raw data supporting the conclusions of this article will be made available by the authors,  
509 without undue reservation.

#### 510 **Reference**

511 **Auria L, Moro RA.** 2008. Support vector machines (SVM) as a technique for solvency analysis.  
512 **Awad M, Khanna R.** 2015. Support vector regression. *Efficient learning machines*: Springer,  
513 67-80.

- 514 **Bao Y, Kurle JE, Anderson G, Young ND.** 2015. Association mapping and genomic prediction  
515 for resistance to sudden death syndrome in early maturing soybean germplasm. *Molecular*  
516 *Breeding* **35**, 1-14.
- 517 **Bates D, Mächler M, Bolker B, Walker S.** 2014. Fitting linear mixed-effects models using  
518 lme4. arXiv preprint arXiv:1406.5823.
- 519 **Bates D, Sarkar D, Bates MD, Matrix L.** 2007. The lme4 package. R package version **2**, 74.
- 520 **Bäurle I, Dean C.** 2008. Differential interactions of the autonomous pathway RRM proteins and  
521 chromatin regulators in the silencing of Arabidopsis targets. *PLoS ONE* **3**, e2733.
- 522 **Belayneh A, Adamowski J, Khalil B, Ozga-Zielinski B.** 2014. Long-term SPI drought  
523 forecasting in the Awash River Basin in Ethiopia using wavelet neural network and wavelet  
524 support vector regression models. *Journal of Hydrology* **508**, 418-429.
- 525 **Benjamini Y, Hochberg Y.** 1995. Controlling the false discovery rate: a practical and powerful  
526 approach to multiple testing. *Journal of the Royal Statistical Society: Series B (Methodological)*  
527 **57**, 289-300.
- 528 **Block MA, Jouhet J.** 2015. Lipid trafficking at endoplasmic reticulum–chloroplast membrane  
529 contact sites. *Current opinion in cell biology* **35**, 21-29.
- 530 **Botta V, Louppe G, Geurts P, Wehenkel L.** 2014. Exploiting SNP correlations within random  
531 forest for genome-wide association studies. *PLoS ONE* **9**, e93379.
- 532 **Bowley S.** 1999. *A hitchhiker's guide to statistics in plant biology*: Guelph, Ont.: Any Old  
533 Subject Books.
- 534 **Breiman L.** 2001. Random forests. *Machine learning* **45**, 5-32.
- 535 **Buzzell R.** 1971. Inheritance of a soybean flowering response to fluorescent-daylength  
536 conditions. *Canadian Journal of Genetics and Cytology* **13**, 703-707.
- 537 **Casal JJ.** 2013. Photoreceptor signaling networks in plant responses to shade. *Annual review of*  
538 *plant biology* **64**, 403-427.
- 539 **Cassell BG.** 2009. Using heritability for genetic improvement.
- 540 **Chang H-X, Hartman GL.** 2017. Characterization of insect resistance loci in the USDA  
541 soybean germplasm collection using genome-wide association studies. *Frontiers in plant science*  
542 **8**, 670.
- 543 **Che Z, Liu H, Yi F, Cheng H, Yang Y, Wang L, Du J, Zhang P, Wang J, Yu D.** 2017.  
544 Genome-Wide Association Study Reveals Novel Loci for SC7 Resistance in a Soybean Mutant  
545 Panel. *Frontiers in plant science* **8**.
- 546 **Chen JH, Verghese A.** 2020. Planning for the Known Unknown: Machine Learning for Human  
547 Healthcare Systems. *The American Journal of Bioethics* **20**, 1-3.
- 548 **Churchill GA, Doerge RW.** 1994. Empirical threshold values for quantitative trait mapping.  
549 *Genetics* **138**, 963-971.
- 550 **Contreras-Soto RI, Mora F, de Oliveira MAR, Higashi W, Scapim CA, Schuster I.** 2017. A  
551 genome-wide association study for agronomic traits in soybean using SNP markers and SNP-  
552 based haplotype analysis. *PLoS ONE* **12**, e0171105.
- 553 **Cook DE, Bayless AM, Wang K, Guo X, Song Q, Jiang J, Bent AF.** 2014. Distinct copy  
554 number, coding sequence, and locus methylation patterns underlie Rhg1-mediated soybean  
555 resistance to soybean cyst nematode. *Plant Physiology* **165**, 630-647.
- 556 **Cooper M, van Eeuwijk FA, Hammer GL, Podlich DW, Messina C.** 2009. Modeling QTL for  
557 complex traits: detection and context for plant breeding. *Current Opinion in Plant Biology* **12**,  
558 231-240.

- 559 **Copley TR, Duceppe M-O, O'Donoghue LS.** 2018. Identification of novel loci associated  
560 with maturity and yield traits in early maturity soybean plant introduction lines. *BMC Genomics*  
561 **19**, 1-12.
- 562 **Cortes C, Vapnik V.** 1995. Support vector machine. *Machine learning* **20**, 273-297.
- 563 **De Wit M, Galvão VC, Fankhauser C.** 2016. Light-mediated hormonal regulation of plant  
564 growth and development. *Annual review of plant biology* **67**, 513-537.
- 565 **Denton SM, Salleb-Aouissi A.** 2020. A Weighted Solution to SVM Actionability and  
566 Interpretability. arXiv preprint arXiv:2012.03372.
- 567 **Dhanapal AP, Ray JD, Singh SK, Hoyos-Villegas V, Smith JR, Purcell LC, King CA,**  
568 **Cregan PB, Song Q, Fritschi FB.** 2015a. Genome-wide association study (GWAS) of carbon  
569 isotope ratio ( $\delta^{13}\text{C}$ ) in diverse soybean [*Glycine max* (L.) Merr.] genotypes. *Theoretical and*  
570 *Applied Genetics* **128**, 73-91.
- 571 **Dhanapal AP, Ray JD, Singh SK, Hoyos-Villegas V, Smith JR, Purcell LC, King CA,**  
572 **Fritschi FB.** 2015b. Association mapping of total carotenoids in diverse soybean genotypes  
573 based on leaf extracts and high-throughput canopy spectral reflectance measurements. *PLoS*  
574 *ONE* **10**, e0137213.
- 575 **Dhanapal AP, Ray JD, Smith JR, Purcell LC, Fritschi FB.** 2018. Identification of Novel  
576 Genomic Loci Associated with Soybean Shoot Tissue Macro and Micronutrient Concentrations.  
577 *The Plant Genome* **11**, 170066.
- 578 **Ditta G, Pinyopich A, Robles P, Pelaz S, Yanofsky MF.** 2004. The SEP4 gene of *Arabidopsis*  
579 *thaliana* functions in floral organ and meristem identity. *Current Biology* **14**, 1935-1940.
- 580 **Doerge RW, Churchill GA.** 1996. Permutation tests for multiple loci affecting a quantitative  
581 character. *Genetics* **142**, 285-294.
- 582 **Du J, Wang S, He C, Zhou B, Ruan Y-L, Shou H.** 2017. Identification of regulatory networks  
583 and hub genes controlling soybean seed set and size using RNA sequencing analysis. *Journal of*  
584 *experimental botany* **68**, 1955-1972.
- 585 **Duan K-B, Rajapakse JC, Wang H, Azuaje F.** 2005. Multiple SVM-RFE for gene selection in  
586 cancer classification with expression data. *IEEE transactions on nanobioscience* **4**, 228-234.
- 587 **Fang C, Ma Y, Wu S, Liu Z, Wang Z, Yang R, Hu G, Zhou Z, Yu H, Zhang M.** 2017.  
588 Genome-wide association studies dissect the genetic networks underlying agronomical traits in  
589 soybean. *Genome Biology* **18**, 1-14.
- 590 **Fehr W, Caviness C.** 1971. Burmood DT, Penington J S. Development description of soybean,  
591 *Glycine max* (L) Mer. *Crop science* **11**, 929-931.
- 592 **Figueiredo DD, Köhler C.** 2018. Auxin: a molecular trigger of seed development. *Genes &*  
593 *development* **32**, 479-490.
- 594 **Fletcher T.** 2009. Support vector machines explained. Tutorial paper., Mar, 28.
- 595 **Gao X, Liang W, Yin C, Ji S, Wang H, Su X, Guo C, Kong H, Xue H, Zhang D.** 2010. The  
596 SEPALLATA-like gene OsMADS34 is required for rice inflorescence and spikelet development.  
597 *Plant Physiology* **153**, 728-740.
- 598 **Goldberger AS.** 1962. Best linear unbiased prediction in the generalized linear regression  
599 model. *Journal of the American Statistical Association* **57**, 369-375.
- 600 **Grömping U.** 2009. Variable importance assessment in regression: linear regression versus  
601 random forest. *The American Statistician* **63**, 308-319.
- 602 **Herbert S, Litchfield G.** 1982. Partitioning Soybean Seed Yield Components 1. *Crop science*  
603 **22**, 1074-1079.

- 604 **Hesami M, Jones AMP.** 2020. Application of artificial intelligence models and optimization  
605 algorithms in plant cell and tissue culture. *Applied Microbiology and Biotechnology*, 1-37.
- 606 **Hesami M, Naderi R, Tohidfar M, Yoosefzadeh-Najafabadi M.** 2020. Development of  
607 support vector machine-based model and comparative analysis with artificial neural network for  
608 modeling the plant tissue culture procedures: effect of plant growth regulators on somatic  
609 embryogenesis of chrysanthemum, as a case study. *Plant methods* **16**, 1-15.
- 610 **Hu D, Zhang H, Du Q, Hu Z, Yang Z, Li X, Wang J, Huang F, Yu D, Wang H.** 2020.  
611 Genetic dissection of yield-related traits via genome-wide association analysis across multiple  
612 environments in wild soybean (*Glycine soja* Sieb. and Zucc.). *Planta* **251**, 39.
- 613 **Hu Z, Zhang D, Zhang G, Kan G, Hong D, Yu D.** 2014. Association mapping of yield-related  
614 traits and SSR markers in wild soybean (*Glycine soja* Sieb. and Zucc.). *Breeding science* **63**,  
615 441-449.
- 616 **Hussin SH, Wang H, Tang S, Zhi H, Tang C, Zhang W, Jia G, Diao X.** 2021. SiMADS34, an  
617 E-class MADS-box transcription factor, regulates inflorescence architecture and grain yield in  
618 *Setaria italica*. *Plant Molecular Biology* **105**, 419-434.
- 619 **Hwang J-U, Song W-Y, Hong D, Ko D, Yamaoka Y, Jang S, Yim S, Lee E, Khare D, Kim**  
620 **K.** 2016. Plant ABC transporters enable many unique aspects of a terrestrial plant's lifestyle.  
621 *Molecular Plant* **9**, 338-355.
- 622 **Jamil IN, Remali J, Azizan KA, Muhammad NAN, Arita M, Goh H-H, Aizat WM.** 2020.  
623 Systematic Multi-Omics Integration (MOI) Approach in Plant Systems Biology. *Frontiers in*  
624 *plant science* **11**.
- 625 **Jordan MI, Mitchell TM.** 2015. Machine learning: Trends, perspectives, and prospects. *Science*  
626 **349**, 255-260.
- 627 **Kahlon CS, Board JE.** 2012. Growth dynamic factors explaining yield improvement in new  
628 versus old soybean cultivars. *Journal of crop improvement* **26**, 282-299.
- 629 **Kahlon CS, Board JE, Kang MS.** 2011. An analysis of yield component changes for new vs.  
630 old soybean cultivars. *Agronomy Journal* **103**, 13-22.
- 631 **Kaler AS, Dhanapal AP, Ray JD, King CA, Fritschi FB, Purcell LC.** 2017. Genome-wide  
632 association mapping of carbon isotope and oxygen isotope ratios in diverse soybean genotypes.  
633 *Crop science* **57**, 3085-3100.
- 634 **Kaler AS, Gillman JD, Beissinger T, Purcell LC.** 2020. Comparing different statistical models  
635 and multiple testing corrections for association mapping in soybean and maize. *Frontiers in plant*  
636 *science* **10**, 1794.
- 637 **Kan G, Zhang W, Yang W, Ma D, Zhang D, Hao D, Hu Z, Yu D.** 2015. Association mapping  
638 of soybean seed germination under salt stress. *Molecular Genetics and Genomics* **290**, 2147-  
639 2162.
- 640 **Kaneko H.** 2020. Support vector regression that takes into consideration the importance of  
641 explanatory variables. *Journal of Chemometrics*, e3327.
- 642 **Katsileros A, Drosou K, Koukouvinos C.** 2015. Evaluation of nearest neighbor methods in  
643 wheat genotype experiments. *Communications in Biometry and Crop Science* **10**, 115-123.
- 644 **Kim CY, Bove J, Assmann SM.** 2008. Overexpression of wound-responsive RNA-binding  
645 proteins induces leaf senescence and hypersensitive-like cell death. *New Phytologist* **180**, 57-  
646 70.
- 647 **Kim GB, Kim WJ, Kim HU, Lee SY.** 2020. Machine learning applications in systems  
648 metabolic engineering. *Current opinion in biotechnology* **64**, 1-9.



- 649 **Kim S, Yamaoka Y, Ono H, Kim H, Shim D, Maeshima M, Martinoia E, Cahoon EB,**  
650 **Nishida I, Lee Y.** 2013. AtABCA9 transporter supplies fatty acids for lipid synthesis to the  
651 endoplasmic reticulum. *Proceedings of the National Academy of Sciences* **110**, 773-778.
- 652 **Kuhn M, Wing J, Weston S, Williams A, Keefer C, Engelhardt A, Cooper T, Mayer Z,**  
653 **Kenkel B, Team RC.** 2020. Package ‘caret’. *The R Journal*.
- 654 **KUSWANTORO H.** 2017. Genetic variability and heritability of acid-adaptive soybean  
655 promising lines. *Biodiversitas Journal of Biological Diversity* **18**.
- 656 **Lambermon MH, Fu Y, Kirk DAW, Dupasquier M, Filipowicz W, Lorković ZJ.** 2002.  
657 UBA1 and UBA2, two proteins that interact with UBP1, a multifunctional effector of pre-mRNA  
658 maturation in plants. *Molecular and Cellular Biology* **22**, 4346-4357.
- 659 **Le BH, Cheng C, Bui AQ, Wagmaister JA, Henry KF, Pelletier J, Kwong L, Belmonte M,**  
660 **Kirkbride R, Horvath S.** 2010. Global analysis of gene activity during Arabidopsis seed  
661 development and identification of seed-specific transcription factors. *Proceedings of the National*  
662 *Academy of Sciences* **107**, 8063-8070.
- 663 **Leamy LJ, Zhang H, Li C, Chen CY, Song B-H.** 2017. A genome-wide association study of  
664 seed composition traits in wild soybean (*Glycine soja*). *BMC Genomics* **18**, 1-15.
- 665 **Lee JH, Ryu H-S, Chung KS, Posé D, Kim S, Schmid M, Ahn JH.** 2013. Regulation of  
666 temperature-responsive flowering by MADS-box transcription factor repressors. *Science* **342**,  
667 628-632.
- 668 **Lee S, Liang X, Woods M, Reiner AS, Concannon P, Bernstein L, Lynch CF, Boice JD,**  
669 **Deasy JO, Bernstein JL.** 2020. Machine learning on genome-wide association studies to predict  
670 the risk of radiation-associated contralateral breast cancer in the WECARE Study. *PLoS ONE*  
671 **15**, e0226157.
- 672 **Legris M, Ince YÇ, Fankhauser C.** 2019. Molecular mechanisms underlying phytochrome-  
673 controlled morphogenesis in plants. *Nature communications* **10**, 1-15.
- 674 **Lepiniec L, Devic M, Roscoe T, Bouyer D, Zhou D-X, Boulard C, Baud S, Dubreucq B.**  
675 2018. Molecular and epigenetic regulations and functions of the LAFL transcriptional regulators  
676 that control seed development. *Plant reproduction* **31**, 291-307.
- 677 **Li C, Zou J, Jiang H, Yu J, Huang S, Wang X, Liu C, Guo T, Zhu R, Wu X.** 2018a.  
678 Identification and validation of number of pod and seed related traits QTLs in soybean. *Plant*  
679 *Breeding* **137**, 730-745.
- 680 **Li J, Kinoshita T, Pandey S, Ng CK-Y, Gygi SP, Shimazaki K-i, Assmann SM.** 2002.  
681 Modulation of an RNA-binding protein by abscisic-acid-activated protein kinase. *Nature* **418**,  
682 793-797.
- 683 **Li X, Tian R, Kamala S, Du H, Li W, Kong Y, Zhang C.** 2018b. Identification and  
684 verification of pleiotropic QTL controlling multiple amino acid contents in soybean seed.  
685 *Euphytica* **214**, 1-14.
- 686 **Li Y-h, Reif JC, Ma Y-s, Hong H-l, Liu Z-x, Chang R-z, Qiu L-j.** 2015. Targeted association  
687 mapping demonstrating the complex molecular genetics of fatty acid formation in soybean. *BMC*  
688 *Genomics* **16**, 1-13.
- 689 **Li Yh, Shi Xh, Li Hh, Reif JC, Wang Jj, Liu Zx, He S, Yu Bs, Qiu Lj.** 2016. Dissecting the  
690 genetic basis of resistance to soybean cyst nematode combining linkage and association  
691 mapping. *The Plant Genome* **9**, plantgenome2015.2004.0020.
- 692 **Lin F, Wani SH, Collins PJ, Wen Z, Li W, Zhang N, McCoy AG, Bi Y, Tan R, Zhang S.**  
693 2020. QTL mapping and GWAS for identification of loci conferring partial resistance to *Pythium*  
694 *sylvaticum* in soybean (*Glycine max* (L.) Merr). *Molecular Breeding* **40**, 1-11.

- 695 **Lipka AE, Kandianis CB, Hudson ME, Yu J, Drnevich J, Bradbury PJ, Gore MA.** 2015.  
696 From association to prediction: statistical methods for the dissection and selection of complex  
697 traits in plants. *Current Opinion in Plant Biology* **24**, 110-118.
- 698 **Lipka AE, Tian F, Wang Q, Peiffer J, Li M, Bradbury PJ, Gore MA, Buckler ES, Zhang Z.**  
699 2012. GAPIT: genome association and prediction integrated tool. *Bioinformatics* **28**, 2397-2399.
- 700 **Liu B, Liu X, Wang C, Li Y, Jin J, Herbert S.** 2010. Soybean yield and yield component  
701 distribution across the main axis in response to light enrichment and shading under different  
702 densities. *Plant, Soil and Environment* **56**, 384-392.
- 703 **Liu C, Teo ZWN, Bi Y, Song S, Xi W, Yang X, Yin Z, Yu H.** 2013. A conserved genetic  
704 pathway determines inflorescence architecture in Arabidopsis and rice. *Developmental cell* **24**,  
705 612-622.
- 706 **Liu F, Quesada V, Crevillén P, Bäurle I, Swiezewski S, Dean C.** 2007. The Arabidopsis  
707 RNA-binding protein FCA requires a lysine-specific demethylase 1 homolog to downregulate  
708 FLC. *Molecular cell* **28**, 398-407.
- 709 **Liu X, Huang M, Fan B, Buckler ES, Zhang Z.** 2016. Iterative usage of fixed and random  
710 effect models for powerful and efficient genome-wide association studies. *PLoS Genetics* **12**,  
711 e1005767.
- 712 **Ma B, Dwyer LM, Costa C, Cober ER, Morrison MJ.** 2001. Early prediction of soybean yield  
713 from canopy reflectance measurements. *Agronomy Journal* **93**, 1227-1234.
- 714 **Mangena P.** 2020. Phytocystatins and their Potential Application in the Development of  
715 Drought Tolerance Plants in Soybeans (*Glycine max* L.). *Protein and Peptide Letters* **27**, 135-  
716 144.
- 717 **Mao T, Li J, Wen Z, Wu T, Wu C, Sun S, Jiang B, Hou W, Li W, Song Q.** 2017. Association  
718 mapping of loci controlling genetic and environmental interaction of soybean flowering time  
719 under various photo-thermal conditions. *BMC Genomics* **18**, 1-17.
- 720 **Meinshausen N.** 2006. Quantile regression forests. *Journal of Machine Learning Research* **7**,  
721 983-999.
- 722 **Moellers TC, Singh A, Zhang J, Brungardt J, Kabbage M, Mueller DS, Grau CR, Ranjan**  
723 **A, Smith DL, Chowda-Reddy R.** 2017. Main and epistatic loci studies in soybean for  
724 *Sclerotinia sclerotiorum* resistance reveal multiple modes of resistance in multi-environments.  
725 *Scientific reports* **7**, 1-13.
- 726 **Mohammadi M, Xavier A, Beckett T, Beyer S, Chen L, Chikssa H, Cross V, Moreira FF,**  
727 **French E, Gaire R.** 2020. Identification, Deployment, and Transferability of Quantitative Trait  
728 Loci from Genome-Wide Association Studies in Plants. *Current Plant Biology*, 100145.
- 729 **Na J-K, Kim J-K, Kim D-Y, Assmann SM.** 2015. Expression of potato RNA-binding proteins  
730 StUBA2a/b and StUBA2c induces hypersensitive-like cell death and early leaf senescence in  
731 Arabidopsis. *Journal of experimental botany* **66**, 4023-4033.
- 732 **Nico M, Miralles DJ, Kantolic AG.** 2019. Natural post-flowering photoperiod and photoperiod  
733 sensitivity: Roles in yield-determining processes in soybean. *Field crops research* **231**, 141-152.
- 734 **Ogotu JO, Piepho H-P, Schulz-Streeck T.** 2011. A comparison of random forests, boosting  
735 and support vector machines for genomic selection. *BMC proceedings*, Vol. 5: Springer, S11.
- 736 **Orozco-Arroyo G, Paolo D, Ezquer I, Colombo L.** 2015. Networks controlling seed size in  
737 Arabidopsis. *Plant reproduction* **28**, 17-32.
- 738 **Pasaniuc B, Price AL.** 2017. Dissecting the genetics of complex traits using summary  
739 association statistics. *Nature reviews genetics* **18**, 117-127.

- 740 **Pedersen P, Lauer JG.** 2004. Response of soybean yield components to management system  
741 and planting date. *Agronomy Journal* **96**, 1372-1381.
- 742 **Pelletier JM, Kwong RW, Park S, Le BH, Baden R, Cagliari A, Hashimoto M, Munoz MD,**  
743 **Fischer RL, Goldberg RB.** 2017. LEC1 sequentially regulates the transcription of genes  
744 involved in diverse developmental processes during seed development. *Proceedings of the*  
745 *National Academy of Sciences* **114**, E6710-E6719.
- 746 **Price T, Schluter D.** 1991. On the low heritability of life-history traits. *Evolution* **45**, 853-861.
- 747 **Priolli RHG, Campos J, Stabellini N, Pinheiro J, Vello N.** 2015. Association mapping of oil  
748 content and fatty acid components in soybean. *Euphytica* **203**, 83-96.
- 749 **Qin J, Song Q, Shi A, Li S, Zhang M, Zhang B.** 2017. Genome-wide association mapping of  
750 resistance to *Phytophthora sojae* in a soybean [*Glycine max* (L.) Merr.] germplasm panel from  
751 maturity groups IV and V. *PLoS ONE* **12**, e0184613.
- 752 **Raj A, Stephens M, Pritchard JK.** 2014. fastSTRUCTURE: variational inference of population  
753 structure in large SNP data sets. *Genetics* **197**, 573-589.
- 754 **Ray JD, Dhanapal AP, Singh SK, Hoyos-Villegas V, Smith JR, Purcell LC, King CA,**  
755 **Boykin D, Cregan PB, Song Q.** 2015. Genome-wide association study of ureide concentration  
756 in diverse maturity group IV soybean [*Glycine max* (L.) Merr.] accessions. *G3: Genes,*  
757 *Genomes, Genetics* **5**, 2391-2403.
- 758 **Rębilas K, Klimek-Kopyra A, Baciór M, Zając T.** 2020. A model for the yield losses  
759 estimation in an early soybean (*Glycine max* (L.) Merr.) cultivar depending on the cutting height  
760 at harvest. *Field crops research* **254**, 107846.
- 761 **Reynolds M.** 2001. *Application of physiology in wheat breeding: Cimmyt.*
- 762 **Richards R.** 1982. Breeding and selecting for drought resistant wheat. p. 303–316. Drought  
763 resistance in crops with emphasis on rice. IRRI, Manila, Philippines. Breeding and selecting for  
764 drought resistant wheat. p. 303–316. In *Drought resistance in crops with emphasis on rice.* IRRI,  
765 Manila, Philippines., -.
- 766 **Robinson AP, Conley SP, Volenec JJ, Santini JB.** 2009. Analysis of high yielding,  
767 early-planted soybean in Indiana. *Agronomy Journal* **101**, 131-139.
- 768 **Rotundo JL, Borrás L, Westgate ME, Orf JH.** 2009. Relationship between assimilate supply  
769 per seed during seed filling and soybean seed composition. *Field crops research* **112**, 90-96.
- 770 **Ruan Y-L, Patrick JW, Bouzayen M, Osorio S, Fernie AR.** 2012. Molecular regulation of  
771 seed and fruit set. *Trends in plant science* **17**, 656-665.
- 772 **Severin AJ, Woody JL, Bolon Y-T, Joseph B, Diers BW, Farmer AD, Muehlbauer GJ,**  
773 **Nelson RT, Grant D, Specht JE.** 2010. RNA-Seq Atlas of *Glycine max*: a guide to the soybean  
774 transcriptome. *BMC plant biology* **10**, 1-16.
- 775 **Siegmann B, Jarmer T.** 2015. Comparison of different regression models and validation  
776 techniques for the assessment of wheat leaf area index from hyperspectral data. *International*  
777 *Journal of Remote Sensing* **36**, 4519-4534.
- 778 **Sonah H, Bastien M, Iquira E, Tardivel A, Légaré G, Boyle B, Normandeau É, Laroche J,**  
779 **Larose S, Jean M, Belzile F.** 2013. An Improved Genotyping by Sequencing (GBS) Approach  
780 Offering Increased Versatility and Efficiency of SNP Discovery and Genotyping. *PLoS ONE* **8**,  
781 e54603.
- 782 **Sonah H, O'Donoghue L, Cober E, Rajcan I, Belzile F.** 2015. Identification of loci  
783 governing eight agronomic traits using a GBS-GWAS approach and validation by QTL  
784 mapping in soya bean. *Plant biotechnology journal* **13**, 211-221.

- 785 **Song J, Sun X, Zhang K, Liu S, Wang J, Yang C, Jiang S, Siyal M, Li X, Qi Z.** 2020.  
786 Identification of QTL and genes for pod number in soybean by linkage analysis and genome-  
787 wide association studies. *Molecular Breeding* **40**, 1-14.
- 788 **Streitner C, Danisman S, Wehrle F, Schöning JC, Alfano JR, Staiger D.** 2008. The small  
789 glycine-rich RNA binding protein AtGRP7 promotes floral transition in *Arabidopsis thaliana*.  
790 *The Plant Journal* **56**, 239-250.
- 791 **Stroup W, Mulitze D.** 1991. Nearest neighbor adjusted best linear unbiased prediction. *The*  
792 *American Statistician* **45**, 194-200.
- 793 **Su Q, Lu W, Du D, Chen F, Niu B, Chou K-C.** 2017. Prediction of the aquatic toxicity of  
794 aromatic compounds to *tetrahymena pyriformis* through support vector regression. *Oncotarget* **8**,  
795 49359.
- 796 **Suhre JJ, Weidenbenner NH, Rowntree SC, Wilson EW, Naeve SL, Conley SP, Casteel SN,**  
797 **Diers BW, Esker PD, Specht JE.** 2014. Soybean yield partitioning changes revealed by genetic  
798 gain and seeding rate interactions. *Agronomy Journal* **106**, 1631-1642.
- 799 **Sulistyo A, Sari K.** 2018. Correlation, path analysis and heritability estimation for agronomic  
800 traits contribute to yield on soybean. *IOP Conference Series: Earth and Environmental Science*,  
801 Vol. 102, 012034.
- 802 **Sun S, Wang C, Ding H, Zou Q.** 2020. Machine learning and its applications in plant molecular  
803 studies. *Briefings in Functional Genomics* **19**, 40-48.
- 804 **Sun X, Shantharaj D, Kang X, Ni M.** 2010. Transcriptional and hormonal signaling control of  
805 *Arabidopsis* seed development. *Current Opinion in Plant Biology* **13**, 611-620.
- 806 **Szymczak S, Biernacka JM, Cordell HJ, González-Recio O, König IR, Zhang H, Sun YV.**  
807 2009. Machine learning in genome-wide association studies. *Genetic epidemiology* **33**, S51-  
808 S57.
- 809 **Temesgen D, Assefa F.** 2020. Inoculation of native symbiotic effective *Sinorhizobium* spp.  
810 enhanced soybean [*Glycine max* (L.) Merr.] grain yield in Ethiopia. *Environmental Systems*  
811 *Research* **9**, 1-19.
- 812 **Torkamaneh D, Laroche J, Belzile F.** 2020. Fast-GBS v2.0: an analysis toolkit for genotyping-  
813 by-sequencing data. *Genome* **63**, 577-581.
- 814 **Tulpan D.** 2020. 311 A brief overview, comparison and practical applications of machine  
815 learning models. *Journal of animal science* **98**, 44-45.
- 816 **Vuong T, Sonah H, Meinhardt C, Deshmukh R, Kadam S, Nelson R, Shannon J, Nguyen**  
817 **H.** 2015. Genetic architecture of cyst nematode resistance revealed by genome-wide association  
818 study in soybean. *BMC Genomics* **16**, 1-13.
- 819 **Wang L, Hu X, Jiao C, Li Z, Fei Z, Yan X, Liu C, Wang Y, Wang X.** 2016. Transcriptome  
820 analyses of seed development in grape hybrids reveals a possible mechanism influencing seed  
821 size. *BMC Genomics* **17**, 1-15.
- 822 **Watanabe S, Hideshima R, Xia Z, Tsubokura Y, Sato S, Nakamoto Y, Yamanaka N,**  
823 **Takahashi R, Ishimoto M, Anai T.** 2009. Map-based cloning of the gene associated with the  
824 soybean maturity locus E3. *Genetics* **182**, 1251-1262.
- 825 **Weber H, Borisjuk L, Wobus U.** 2005. Molecular physiology of legume seed development.  
826 *Annu. Rev. Plant Biol.* **56**, 253-279.
- 827 **Wen Y-J, Zhang H, Ni Y-L, Huang B, Zhang J, Feng J-Y, Wang S-B, Dunwell JM, Zhang**  
828 **Y-M, Wu R.** 2018. Methodological implementation of mixed linear models in multi-locus  
829 genome-wide association studies. *Briefings in bioinformatics* **19**, 700-712.

- 830 **Wen Z, Tan R, Yuan J, Bales C, Du W, Zhang S, Chilvers MI, Schmidt C, Song Q, Cregan**  
831 **PB.** 2014. Genome-wide association mapping of quantitative resistance to sudden death  
832 syndrome in soybean. *BMC Genomics* **15**, 1-11.
- 833 **Weston J, Mukherjee S, Chapelle O, Pontil M, Poggio T, Vapnik V.** 2001. Feature selection  
834 for SVMs. *Advances in neural information processing systems*, 668-674.
- 835 **Wickham H.** 2011. ggplot2. *Wiley Interdisciplinary Reviews: Computational Statistics* **3**, 180-  
836 185.
- 837 **Williamson BD, Gilbert PB, Simon NR, Carone M.** 2020. A unified approach for inference on  
838 algorithm-agnostic variable importance. arXiv preprint arXiv:2004.03683.
- 839 **Wu Y, Liu Y.** 2009. Variable selection in quantile regression. *Statistica Sinica*, 801-817.
- 840 **Xavier A, Jarquin D, Howard R, Ramasubramanian V, Specht JE, Graef GL, Beavis WD,**  
841 **Diers BW, Song Q, Cregan PB.** 2018. Genome-wide analysis of grain yield stability and  
842 environmental interactions in a multiparental soybean population. *G3: Genes, Genomes,*  
843 *Genetics* **8**, 519-529.
- 844 **Xavier A, Muir WM, Rainey KM.** 2016a. Assessing predictive properties of genome-wide  
845 selection in soybeans. *G3: Genes, Genomes, Genetics* **6**, 2611-2616.
- 846 **Xavier A, Muir WM, Rainey KM.** 2016b. Impact of imputation methods on the amount of  
847 genetic variation captured by a single-nucleotide polymorphism panel in soybeans. *BMC*  
848 *Bioinformatics* **17**, 1-9.
- 849 **Xavier A, Rainey KM.** 2020. Quantitative Genomic Dissection of Soybean Yield Components.  
850 *G3: Genes, Genomes, Genetics* **10**, 665-675.
- 851 **Yang J, Yeh C-TE, Ramamurthy RK, Qi X, Fernando RL, Dekkers JC, Garrick DJ,**  
852 **Nettleton D, Schnable PS.** 2018. Empirical comparisons of different statistical models to  
853 identify and validate kernel row number-associated variants from structured multi-parent  
854 mapping populations of maize. *G3: Genes, Genomes, Genetics* **8**, 3567-3575.
- 855 **Yin Z, Qi H, Mao X, Wang J, Hu Z, Wu X, Liu C, Xin D, Zuo X, Chen Q.** 2018. QTL  
856 mapping of soybean node numbers on the main stem and meta-analysis for mining candidate  
857 genes. *Biotechnology & Biotechnological Equipment* **32**, 915-922.
- 858 **Yoosefzadeh-Najafabadi M, Earl HJ, Tulpan D, Sulik J, Eskandari M.** 2021a. Application  
859 of Machine Learning Algorithms in Plant Breeding: Predicting Yield From Hyperspectral  
860 Reflectance in Soybean. *Frontiers in plant science* **11**.
- 861 **Yoosefzadeh-Najafabadi M, Tulpan D, Eskandari M.** 2021b. Application of machine learning  
862 and genetic optimization algorithms for modeling and optimizing soybean yield using its  
863 component traits. *PLoS ONE* **16**, e0250665.
- 864 **Zhang H, Hao D, Siteo HM, Yin Z, Hu Z, Zhang G, Yu D.** 2015a. Genetic dissection of the  
865 relationship between plant architecture and yield component traits in soybean (*Glycine max*) by  
866 association analysis across multiple environments. *Plant Breeding* **134**, 564-572.
- 867 **Zhang J, Song Q, Cregan PB, Jiang G-L.** 2016. Genome-wide association study, genomic  
868 prediction and marker-assisted selection for seed weight in soybean (*Glycinemax*). *Theoretical*  
869 *and Applied Genetics* **129**, 117-130.
- 870 **Zhang J, Song Q, Cregan PB, Nelson RL, Wang X, Wu J, Jiang G-L.** 2015b. Genome-wide  
871 association study for flowering time, maturity dates and plant height in early maturing soybean  
872 (*Glycine max*) germplasm. *BMC Genomics* **16**, 1-11.
- 873 **Zhang J, Wang X, Lu Y, Bhusal SJ, Song Q, Cregan PB, Yen Y, Brown M, Jiang G-L.**  
874 2018. Genome-wide Scan for Seed Composition Provides Insights into Soybean Quality  
875 Improvement and the Impacts of Domestication and Breeding. *Molecular Plant* **11**, 460-472.

876

877 **Tables**  
878

**Table 1.** The list of detected QTL for soybean maturity using different GWAS methods in the tested soybean population.

| GWAS Method             | Chromosome | Peak SNP position | Detected QTL              | Environment <sup>a</sup>   | Reference                       |
|-------------------------|------------|-------------------|---------------------------|----------------------------|---------------------------------|
| MLM                     | 2          | 2212910           | Sclero 3-g31              | NA                         | (Moellers <i>et al.</i> , 2017) |
|                         |            | 8233782           | Seed Weight 6-g1          | NA                         | (Sonah <i>et al.</i> , 2015)    |
| FarmCPU                 | 2          | 2212910           | Sclero 3-g31              | NA                         | (Moellers <i>et al.</i> , 2017) |
|                         |            | 8233766           | Seed Weight 6-g1          | NA                         | (Sonah <i>et al.</i> , 2015)    |
|                         | 20         | 37765851          | WUE 2-g53                 | NA                         | (Kaler <i>et al.</i> , 2017)    |
| RF                      | 3          | 2978272           | Leaflet area 1-g2.1       | NA                         | (Fang <i>et al.</i> , 2017)     |
|                         |            |                   | Leaflet width 1-g4.1      | NA                         | (Fang <i>et al.</i> , 2017)     |
|                         |            |                   | Leaflet area 1-g2.2       | NA                         | (Fang <i>et al.</i> , 2017)     |
|                         |            |                   | Leaflet width 1-g4.2      | NA                         | (Fang <i>et al.</i> , 2017)     |
|                         |            |                   | Salt tolerance 1-g12      | NA                         | (Kan <i>et al.</i> , 2015)      |
|                         | 16         | 5730281           | Plant height 6-g17        | NA                         | (Zhang <i>et al.</i> , 2015b)   |
|                         |            |                   | Plant height 1-g17        | NA                         | (Zhang <i>et al.</i> , 2015b)   |
|                         | 17         | 34757372          | First flower 4-g63        | NA                         | (Mao <i>et al.</i> , 2017)      |
| SDS root retention 1-g6 |            |                   | NA                        | (Bao <i>et al.</i> , 2015) |                                 |
| SVR                     | 2          | 695362            | Seed linolenic 2-g1       | NA                         | (Leamy <i>et al.</i> , 2017)    |
|                         |            |                   | Seed linolenic 2-g2       | NA                         | (Leamy <i>et al.</i> , 2017)    |
|                         |            |                   | SDS 1-g12.1               | 2                          | (Wen <i>et al.</i> , 2014)      |
|                         |            |                   | SDS 1-g12.2               | 2                          | (Wen <i>et al.</i> , 2014)      |
|                         |            |                   | Ureide content 1-g2       | 2                          | (Ray <i>et al.</i> , 2015)      |
|                         | 10         | 1595239           | SDS 1-g12.3               | NA                         | (Wen <i>et al.</i> , 2014)      |
|                         |            |                   | Shoot Cu 1-g8             | NA                         | (Dhanapal <i>et al.</i> , 2018) |
|                         |            |                   | Seed oil 5-g3             | NA                         | (Sonah <i>et al.</i> , 2015)    |
|                         | 16         | 2438652           | Reproductive period 4-g16 | NA                         | (Zhang <i>et al.</i> , 2015b)   |
|                         |            |                   | R8 full maturity 9-g2     | NA                         | (Zhang <i>et al.</i> , 2015b)   |
|                         |            |                   | Reproductive period 2-g16 | NA                         | (Zhang <i>et al.</i> , 2015b)   |
|                         | 19         | 2460921           | R8 full maturity 2-g2     | NA                         | (Zhang <i>et al.</i> , 2015b)   |
|                         |            |                   | R8 full maturity 4-g1     | NA                         | (Sonah <i>et al.</i> , 2015)    |
| First flower 4-g81      |            |                   | NA                        | (Mao <i>et al.</i> , 2017) |                                 |

<sup>a</sup> Detected in separate environments (1: 2018Ridgetown, 2:2019Ridgetown, 3:2018Palmyra, 4:2019Palmyra, NA: Not found in any environment). MLM: Mixed Linear Model, FarmCPU: Fixed and random model circulating probability unification, RF: Random Forest, SVR: Support Vector Regression

**Table 1.** The list of detected QTL for soybean yield using different GWAS methods in the tested soybean population.

| GWAS Method | Chromosome | Peak SNP position | Detected QTL           | Environment <sup>a</sup> | Reference                       |                           |                                       |
|-------------|------------|-------------------|------------------------|--------------------------|---------------------------------|---------------------------|---------------------------------------|
| MLM         | 5          | 34391386          | Ureide content 1-g16.1 | NA                       | (Ray <i>et al.</i> , 2015)      |                           |                                       |
|             |            |                   | Ureide content 1-g16.2 | NA                       | (Ray <i>et al.</i> , 2015)      |                           |                                       |
| FarmCPU     | 5          | 34391386          | Ureide content 1-g16.1 | NA                       | (Ray <i>et al.</i> , 2015)      |                           |                                       |
|             |            |                   | Ureide content 1-g16.2 | NA                       | (Ray <i>et al.</i> , 2015)      |                           |                                       |
| RF          | 7          | 1032587           | WUE 2-g18              | NA                       | (Kaler <i>et al.</i> , 2017)    |                           |                                       |
|             |            |                   | First flower 4-g10     | NA                       | (Mao <i>et al.</i> , 2017)      |                           |                                       |
|             |            |                   | First flower 3-g2      | NA                       | (Hu <i>et al.</i> , 2014)       |                           |                                       |
|             |            |                   | 36309302               | Seed weight 4-g3         | NA                              | (Hu <i>et al.</i> , 2014) |                                       |
|             |            |                   |                        | Seed yield 4-g2          | NA                              | (Hu <i>et al.</i> , 2014) |                                       |
|             |            |                   | 3                      | 37617293                 | R8 full maturity 3-g3           | NA                        | (Hu <i>et al.</i> , 2014)             |
|             |            |                   |                        |                          | Plant height 3-g17              | NA                        | (Contreras-Soto <i>et al.</i> , 2017) |
|             |            |                   | 7                      | 44488152                 | Leaflet shape 1-g1.1            | NA                        | (Fang <i>et al.</i> , 2017)           |
|             |            |                   |                        |                          | Leaflet shape 1-g1.2            | NA                        | (Fang <i>et al.</i> , 2017)           |
|             |            |                   | 15                     | 34958361                 | Leaflet shape 1-g1.3            | NA                        | (Fang <i>et al.</i> , 2017)           |
|             |            |                   |                        |                          | Seed set 1-g32.1                | NA                        | (Fang <i>et al.</i> , 2017)           |
|             |            |                   | 19                     | 41385139                 | Seed set 1-g32.2                | NA                        | (Fang <i>et al.</i> , 2017)           |
|             |            |                   |                        |                          | Seed yield 4-g4                 | NA                        | (Hu <i>et al.</i> , 2014)             |
| 19          | 41385139   | 1032587           | WUE 2-g18              | NA                       | (Kaler <i>et al.</i> , 2017)    |                           |                                       |
|             |            | 34958361          | SCN 5-g35              | NA                       | (Li <i>et al.</i> , 2016)       |                           |                                       |
| 19          | 41385139   | 41385139          | Seed weight 5-g20      | NA                       | (Zhang <i>et al.</i> , 2016)    |                           |                                       |
|             |            |                   | Seed weight 4-g18      | NA                       | (Hu <i>et al.</i> , 2014)       |                           |                                       |
| 19          | 41385139   | 41385139          | Seed yield 4-g5        | NA                       | (Hu <i>et al.</i> , 2014)       |                           |                                       |
|             |            |                   | Shoot Zn 1-g28.1       | NA                       | (Dhanapal <i>et al.</i> , 2018) |                           |                                       |
| 19          | 41385139   | 41385139          | Shoot Zn 1-g28.2       | NA                       | (Dhanapal <i>et al.</i> , 2018) |                           |                                       |



|                  |    |                                       |
|------------------|----|---------------------------------------|
| Shoot Zn 1-g29.1 | NA | (Dhanapal<br><i>et al.</i> ,<br>2018) |
| Shoot Zn 1-g29.2 | NA | (Dhanapal<br><i>et al.</i> ,<br>2018) |
| Shoot Zn 1-g29.3 | NA | (Dhanapal<br><i>et al.</i> ,<br>2018) |

---

<sup>a</sup> Detected in separate environments (1: 2018Ridgetown, 2:2019Ridgetwon, 3:2018Palmyra, 4:2019Palmyra, NA: Not found in any environment).

MLM: Mixed Linear Model, FarmCPU: Fixed and random model circulating probability unification, RF: Random Forest, SVR: Support Vector Regression

880

881

**Table 2.** The list of detected QTL for soybean total number of nodes per plant (NP) using different GWAS methods in the tested soybean population.

| GWAS Method | Chromosome | Peak SNP position | Detected QTL                     | Environment <sup>a</sup> | Reference                       |
|-------------|------------|-------------------|----------------------------------|--------------------------|---------------------------------|
| FarmCPU     | 19         | 40131952          | Pubescence density 1-g17         | NA                       | (Chang and Hartman, 2017)       |
|             |            |                   | Seed weight 9-g5.1               | NA                       | (Copley <i>et al.</i> , 2018)   |
| RF          | 4          | 1205787           | Shoot Ca 1-g10                   | NA                       | (Dhanapal <i>et al.</i> , 2018) |
|             |            |                   | Seed set 1-g51.1                 | NA                       | (Fang <i>et al.</i> , 2017)     |
|             |            |                   | Seed set 1-g43.1                 | NA                       | (Fang <i>et al.</i> , 2017)     |
|             |            |                   | Seed set 1-g25.1                 | NA                       | (Fang <i>et al.</i> , 2017)     |
|             |            |                   | Seed set 1-g43.2                 | NA                       | (Fang <i>et al.</i> , 2017)     |
|             |            |                   | Seed set 1-g25.2                 | NA                       | (Fang <i>et al.</i> , 2017)     |
|             | 6          | 50570624          | Seed set 1-g51.2                 | NA                       | (Fang <i>et al.</i> , 2017)     |
|             |            |                   | Seed set 1-g43.3                 | NA                       | (Fang <i>et al.</i> , 2017)     |
|             |            |                   | Seed set 1-g51.3                 | NA                       | (Fang <i>et al.</i> , 2017)     |
|             |            |                   | Seed set 1-g25.3                 | NA                       | (Fang <i>et al.</i> , 2017)     |
|             |            |                   | Pod number 1-g3                  | NA                       | (Fang <i>et al.</i> , 2017)     |
|             |            |                   | Seed palmitic 2-g2               | NA                       | (Fang <i>et al.</i> , 2017)     |
| SVR         | 6          | 50570473          | Seed long-chain fatty acid 1-g22 | NA                       | (Fang <i>et al.</i> , 2017)     |
|             |            |                   | Seed set 1-g51.1                 | NA                       | (Fang <i>et al.</i> , 2017)     |
|             |            |                   | Seed set 1-g43.1                 | NA                       | (Fang <i>et al.</i> , 2017)     |
|             |            |                   | Seed set 1-g25.1                 | NA                       | (Fang <i>et al.</i> , 2017)     |
|             |            |                   | Seed set 1-g43.2                 | NA                       | (Fang <i>et al.</i> , 2017)     |
|             |            |                   | Seed set 1-g25.2                 | NA                       | (Fang <i>et al.</i> , 2017)     |
|             |            |                   | Seed set 1-g51.2                 | NA                       | (Fang <i>et al.</i> , 2017)     |
|             |            |                   | Seed set 1-g43.3                 | NA                       | (Fang <i>et al.</i> , 2017)     |
|             |            |                   | Seed set 1-g51.3                 | NA                       | (Fang <i>et al.</i> , 2017)     |
|             |            |                   | Seed set 1-g25.3                 | NA                       | (Fang <i>et al.</i> , 2017)     |

|    |          |                                  |    |                                 |
|----|----------|----------------------------------|----|---------------------------------|
|    |          | Pod number 1-g3                  | NA | (Fang <i>et al.</i> , 2017)     |
|    |          | Seed palmitic 2-g2               | NA | (Fang <i>et al.</i> , 2017)     |
|    |          | Seed long-chain fatty acid 1-g22 | NA | (Fang <i>et al.</i> , 2017)     |
|    | 1032587  | WUE 2-g18                        | NA | (Kaler <i>et al.</i> , 2017)    |
| 7  | 1092403  | WUE 2-g18                        | NA | (Kaler <i>et al.</i> , 2017)    |
|    |          | First flower 3-g4                | NA | (Fang <i>et al.</i> , 2017)     |
|    |          | Leaflet shape 1-g4.1             | NA | (Fang <i>et al.</i> , 2017)     |
|    |          | Leaflet shape 1-g4.2             | NA | (Fang <i>et al.</i> , 2017)     |
|    |          | Leaflet shape 1-g4.3             | NA | (Fang <i>et al.</i> , 2017)     |
|    |          | Seed stearic 4-g5                | NA | (Li <i>et al.</i> , 2015)       |
|    |          | Node number 1-g6.1               | NA | (Fang <i>et al.</i> , 2017)     |
|    |          | Node number 1-g6.2               | NA | (Fang <i>et al.</i> , 2017)     |
|    |          | Pod number 1-g1.1                | NA | (Fang <i>et al.</i> , 2017)     |
|    |          | Pod number 1-g1.2                | NA | (Fang <i>et al.</i> , 2017)     |
| 18 | 55645699 | Pod number 1-g1.3                | NA | (Fang <i>et al.</i> , 2017)     |
|    |          | WUE 3-g31                        | NA | (Kaler <i>et al.</i> , 2017)    |
|    |          | Seed weight, SoyNAM 14-g28       | NA | (Xavier <i>et al.</i> , 2016b)  |
|    |          | Lodging, SoyNAM 4-g15            | NA | (Cook <i>et al.</i> , 2014)     |
|    |          | Branching 1-g1.1                 | NA | (Fang <i>et al.</i> , 2017)     |
|    |          | Plant height 5-g4.2              | NA | (Fang <i>et al.</i> , 2017)     |
|    |          | Plant height 5-g4.3              | NA | (Fang <i>et al.</i> , 2017)     |
|    |          | Shoot p 1-g30                    | NA | (Dhanapal <i>et al.</i> , 2018) |
| 19 | 47350110 | Node number 1-g2.3               | NA | (Fang <i>et al.</i> , 2017)     |

<sup>a</sup> Detected in separate environments (1: 2018Ridgetown, 2:2019Ridgetown, 3:2018Palmyra, 4:2019Palmyra, NA: Not found in any environment). MLM: Mixed Linear Model, FarmCPU: Fixed and random model circulating probability unification, RF: Random Forest, SVR: Support Vector Regression

**Table 3.** The list of detected QTL for soybean total number of non-reproductive nodes per plant (NRNP) using different GWAS methods in the tested soybean population.

| GWAS Method | Chromosome | Peak SNP position    | Detected QTL            | Environment <sup>a</sup> | Reference                     |
|-------------|------------|----------------------|-------------------------|--------------------------|-------------------------------|
| MLM         | 15         | 10193796             | Seed protein 6-g2       | NA                       | (Zhang <i>et al.</i> , 2018)  |
|             |            |                      | Seed Arg 1-g4           | NA                       | (Zhang <i>et al.</i> , 2018)  |
|             |            |                      | Seed coat luster 1-g1.3 | NA                       | (Fang <i>et al.</i> , 2017)   |
| FarmCPU     | 15         | 10193796             | Seed protein 6-g2       | NA                       | (Zhang <i>et al.</i> , 2018)  |
|             |            |                      | Seed Arg 1-g4           | NA                       | (Zhang <i>et al.</i> , 2018)  |
|             |            |                      | Seed coat luster 1-g1.3 | NA                       | (Fang <i>et al.</i> , 2017)   |
| RF          | 1          | 54647498             | First flower 4-g2       | NA                       | (Mao <i>et al.</i> , 2017)    |
|             | 7          | 329800               | Phytoph 2-g32           | NA                       | (Qin <i>et al.</i> , 2017)    |
|             |            |                      | Phytoph 2-g7            | NA                       | (Qin <i>et al.</i> , 2017)    |
|             | 18         | 12945778             | SCN 4-g14               | NA                       | (Vuong <i>et al.</i> , 2015)  |
|             | 19         | 40218800             | Seed weight 9-g5.1      | NA                       | (Copley <i>et al.</i> , 2018) |
| SVR         | 7          | 1032587 <sup>2</sup> | WUE 2-g18               | 2                        | (Kaler <i>et al.</i> , 2017)  |
|             | 19         | 40218800             | Seed weight 9-g5.1      | NA                       | (Copley <i>et al.</i> , 2018) |

<sup>a</sup> Detected in separate environments (1: 2018Ridgetown, 2:2019Ridgetwon, 3:2018Palmyra, 4:2019Palmyra, NA: Not found in any environment).

MLM: Mixed Linear Model, FarmCPU: Fixed and random model circulating probability unification, RF: Random Forest, SVR: Support Vector Regression

883

884

885

**Table 4.** The list of detected QTL for soybean total number of reproductive nodes per plant (RNP) using different GWAS methods in the tested soybean population.

| GWAS Method | Chromosome | Peak SNP position     | Detected QTL              | Environment <sup>a</sup> | Reference                       |
|-------------|------------|-----------------------|---------------------------|--------------------------|---------------------------------|
| RF          | 9          | 40285014              | Shoot Fe 1-g8.1           | NA                       | (Dhanapal <i>et al.</i> , 2018) |
|             |            |                       | Shoot Fe 1-g8.2           | NA                       | (Dhanapal <i>et al.</i> , 2018) |
|             |            |                       | Shoot Fe 1-g8.3           | NA                       | (Dhanapal <i>et al.</i> , 2018) |
|             |            |                       | Shoot Fe 1-g9             | NA                       | (Dhanapal <i>et al.</i> , 2018) |
|             |            |                       | Shoot Fe 1-g10            | NA                       | (Dhanapal <i>et al.</i> , 2018) |
|             |            |                       | Shoot Fe 1-g11            | NA                       | (Dhanapal <i>et al.</i> , 2018) |
|             |            |                       | Soybean mosaic virus 2-g5 | NA                       | (Che <i>et al.</i> , 2017)      |
|             | 15         | 34958361              | SCN 5-g35                 | NA                       | (Li <i>et al.</i> , 2016)       |
| SVR         | 7          | 1032587               | WUE 2-g18                 | NA                       | (Kaler <i>et al.</i> , 2017)    |
|             | 15         | 34958361 <sup>1</sup> | SCN 5-g35                 | 1                        | (Li <i>et al.</i> , 2016)       |

<sup>a</sup> Detected in separate environments (1: 2018Ridgetown, 2:2019Ridgetwon, 3:2018Palmyra, 4:2019Palmyra, NA: Not found in any environment).

MLM: Mixed Linear Model, FarmCPU: Fixed and random model circulating probability unification, RF: Random Forest, SVR: Support Vector Regression

886

887

**Table 5.** The list of detected QTL for soybean total number of pods per plant (PP) using different GWAS methods in the tested soybean population.

| GWAS Method        | Chromosome | Peak position               | SNP      | Detected QTL               | Environment <sup>a</sup> | Reference                        |                             |                            |
|--------------------|------------|-----------------------------|----------|----------------------------|--------------------------|----------------------------------|-----------------------------|----------------------------|
| RF                 | 7          | 15331676                    |          | Seed weight, SoyNAM 14-g11 | NA                       | (Xavier <i>et al.</i> , 2016b)   |                             |                            |
|                    |            |                             |          | First flower 4-g77         | NA                       | (Mao <i>et al.</i> , 2017)       |                             |                            |
|                    | 19         | 42300695                    |          | Lodging, SoyNAM 4-g17      | NA                       | (Cook <i>et al.</i> , 2014)      |                             |                            |
|                    |            |                             |          | Pod number 1-g4.1          | NA                       | (Fang <i>et al.</i> , 2017)      |                             |                            |
|                    | SVR        | 9                           | 39366957 |                            | Pod number 1-g4.2        | NA                               | (Fang <i>et al.</i> , 2017) |                            |
|                    |            |                             |          |                            | Pod number 1-g4.3        | NA                               | (Fang <i>et al.</i> , 2017) |                            |
|                    |            |                             |          |                            | Seed thickness 2-g4      | NA                               | (Fang <i>et al.</i> , 2017) |                            |
|                    |            |                             |          |                            | Seed Thr 2-g1            | NA                               | (Li <i>et al.</i> , 2018b)  |                            |
|                    |            | 9                           | 39372117 |                            |                          | Seed Ser 2-g1                    | NA                          | (Li <i>et al.</i> , 2018b) |
|                    |            |                             |          |                            |                          | Seed Tyr 2-g2                    | NA                          | (Li <i>et al.</i> , 2018b) |
| Seed Lys 2-g2      |            |                             |          |                            |                          | NA                               | (Li <i>et al.</i> , 2018b)  |                            |
| Seed leu 2-g2      |            |                             |          |                            |                          | NA                               | (Li <i>et al.</i> , 2018b)  |                            |
| Seed ile 2-g2      |            |                             |          |                            |                          | NA                               | (Li <i>et al.</i> , 2018b)  |                            |
| Seed Ala 2-g2      |            |                             |          |                            |                          | NA                               | (Li <i>et al.</i> , 2018b)  |                            |
| 11                 | 5245870    |                             |          | Seed Gly 2-g2              | NA                       | (Li <i>et al.</i> , 2018b)       |                             |                            |
|                    |            |                             |          | Ureide content 1-g29       | NA                       | (Ray <i>et al.</i> , 2015)       |                             |                            |
|                    | 55645699   |                             |          |                            | Pod number 1-g6          | NA                               | (Fang <i>et al.</i> , 2017) |                            |
|                    |            |                             |          |                            | Leaflet shape 1-g4.1     | NA                               | (Fang <i>et al.</i> , 2017) |                            |
|                    |            |                             |          |                            | Leaflet shape 1-g4.2     | NA                               | (Fang <i>et al.</i> , 2017) |                            |
|                    |            |                             |          |                            | Leaflet shape 1-g4.3     | NA                               | (Fang <i>et al.</i> , 2017) |                            |
|                    |            |                             |          |                            | Seed stearic 4-g5        | NA                               | (Li <i>et al.</i> , 2015)   |                            |
|                    |            |                             |          |                            | Node number 1-g6.1       | NA                               | (Fang <i>et al.</i> , 2017) |                            |
|                    |            |                             |          |                            | Node number 1-g6.2       | NA                               | (Fang <i>et al.</i> , 2017) |                            |
|                    |            |                             |          |                            | Pode number 1-g1.1       | NA                               | (Fang <i>et al.</i> , 2017) |                            |
| Pode number 1-g1.2 | NA         | (Fang <i>et al.</i> , 2017) |          |                            |                          |                                  |                             |                            |
| 18                 | 55469601   |                             |          | Pode number 1-g1.3         | NA                       | (Fang <i>et al.</i> , 2017)      |                             |                            |
|                    |            |                             |          | WUE 3-g31                  | NA                       | (Dhanapal <i>et al.</i> , 2015a) |                             |                            |
|                    |            |                             |          | Seed weight, SoyNAM 14-g28 | NA                       | (Xavier <i>et al.</i> , 2016b)   |                             |                            |
|                    |            |                             |          | Lodging, SoyNAM 4-g15      | NA                       | (Cook <i>et al.</i> , 2014)      |                             |                            |
|                    |            |                             |          | Branching 1-g1.1           | NA                       | (Fang <i>et al.</i> , 2017)      |                             |                            |
|                    |            |                             |          | Plant height 5-g4.2        | NA                       | (Fang <i>et al.</i> , 2017)      |                             |                            |
|                    |            |                             |          | Plant height 5-g4.3        | NA                       | (Fang <i>et al.</i> , 2017)      |                             |                            |
|                    |            |                             |          | Shoot p 1-g30              | NA                       | (Dhanapal <i>et al.</i> , 2018)  |                             |                            |
|                    |            |                             |          | Seed yield, SoyNAM 7-g19   | NA                       | (Cook <i>et al.</i> , 2014)      |                             |                            |

|    |          |                                 |    |                                  |
|----|----------|---------------------------------|----|----------------------------------|
|    |          | R8 full maturity, SoyNAM 13-g19 | NA | (Cook <i>et al.</i> , 2014)      |
|    |          | Plant height 5-g4.3             | NA | (Fang <i>et al.</i> , 2017)      |
|    |          | Seed weight 9-g5.2              | NA | (Copley <i>et al.</i> , 2018)    |
|    | 43077182 | Seed weight 5-g21               | NA | (Copley <i>et al.</i> , 2018)    |
|    |          | First flower 5-g3               | NA | (Fang <i>et al.</i> , 2017)      |
|    |          | First flower 5-g17              | NA | (Fang <i>et al.</i> , 2017)      |
|    | 47235604 | First flower 4-g77              | NA | (Mao <i>et al.</i> , 2017)       |
| 19 |          | Seed palmitic 1-g19             | NA | (Priolli <i>et al.</i> , 2015)   |
|    |          | Leaf carotenoid content 1-g14   | NA | (Dhanapal <i>et al.</i> , 2015b) |
|    | 47350110 | Ureide content 1-g50.3          | NA | (Ray <i>et al.</i> , 2015)       |
|    |          | Ureide content 1-g50.4          | NA | (Ray <i>et al.</i> , 2015)       |
|    | 47224293 | Node number 1-g2.3              | NA | (Fang <i>et al.</i> , 2017)      |

<sup>a</sup> detected in separate environments (1: 2018Ridgetown, 2:2019Ridgetwon, 3:2018Palmyra, 4:2019Palmyra, NA: Not found in any environment). MLM: Mixed Linear Model, FarmCPU: Fixed and random model circulating probability unification, RF: Random Forest, SVR: Support Vector Regression

889 **Figure legends**

890 **Fig. 1** LD decay distance in the tested 227 soybean genotypes

891 **Fig. 2** The distribution of seed yield (A), maturity (B), NP (C), NRNP (D), RNP (E), and PP (F)  
892 in 227 soybean genotypes across four environments. The estimated heritability is provided for  
893 each of the six traits. RNP: Total number of reproductive nodes per plant, NRNP: The total  
894 number of non-reproductive nodes per plant, NP: The total nodes per plant, PP: The total number  
895 of pods per plant.

896 **Fig. 3** The distributions and Pearson correlations among the soybean seed yield, maturity, and  
897 yield component traits. RNP: Total number of reproductive nodes per plant, NRNP: The total  
898 number of non-reproductive nodes per plant, NP: The total nodes per plant, PP: The total number  
899 of pods per plant. The heat map scale for values is provided by colour for the panel.

900 **Fig. 4** Structure and kinship plots for the 227 soybean genotypes. The x-axis is the number of  
901 genotypes used in this GWAS panel, and the y axis is the membership of each subgroup. G1-G7  
902 stands for the subpopulation.

903 **Fig. 5** Genome-wide Manhattan plots for GWAS studies of A) maturity and B) seed yield in  
904 soybean using MLM, FarmCPU, RF, and SVR methods, from top to bottom, respectively.

905 **Fig. 6** Genome-wide Manhattan plots for GWAS studies of A) the total number of nodes (NP)  
906 and B) the total number of non-reproductive nodes (NRNP) in soybean using MLM, FarmCPU,  
907 RF, and SVR methods, from top to bottom, respectively.

908 **Fig. 7** Genome-wide Manhattan plots for GWAS studies of A) The total number of reproductive  
909 nodes (RNP) and B) the total number of pods (PP) in soybean using MLM, FarmCPU, RF, and  
910 SVR methods, from top to bottom, respectively.

911 **Fig. 8** The average effects of reference allele and alternative allele from the detected SNP's peak  
912 for seed yield (A), maturity (B), NP (C), NRNP (D), RNP (E), and PP (F) in 227 soybean  
913 genotypes across four environments. RNP: Total number of reproductive nodes per plant, NRNP:  
914 The total number of non-reproductive nodes per plant, NP: The total nodes per plant, PP: The  
915 total number of pods per plant



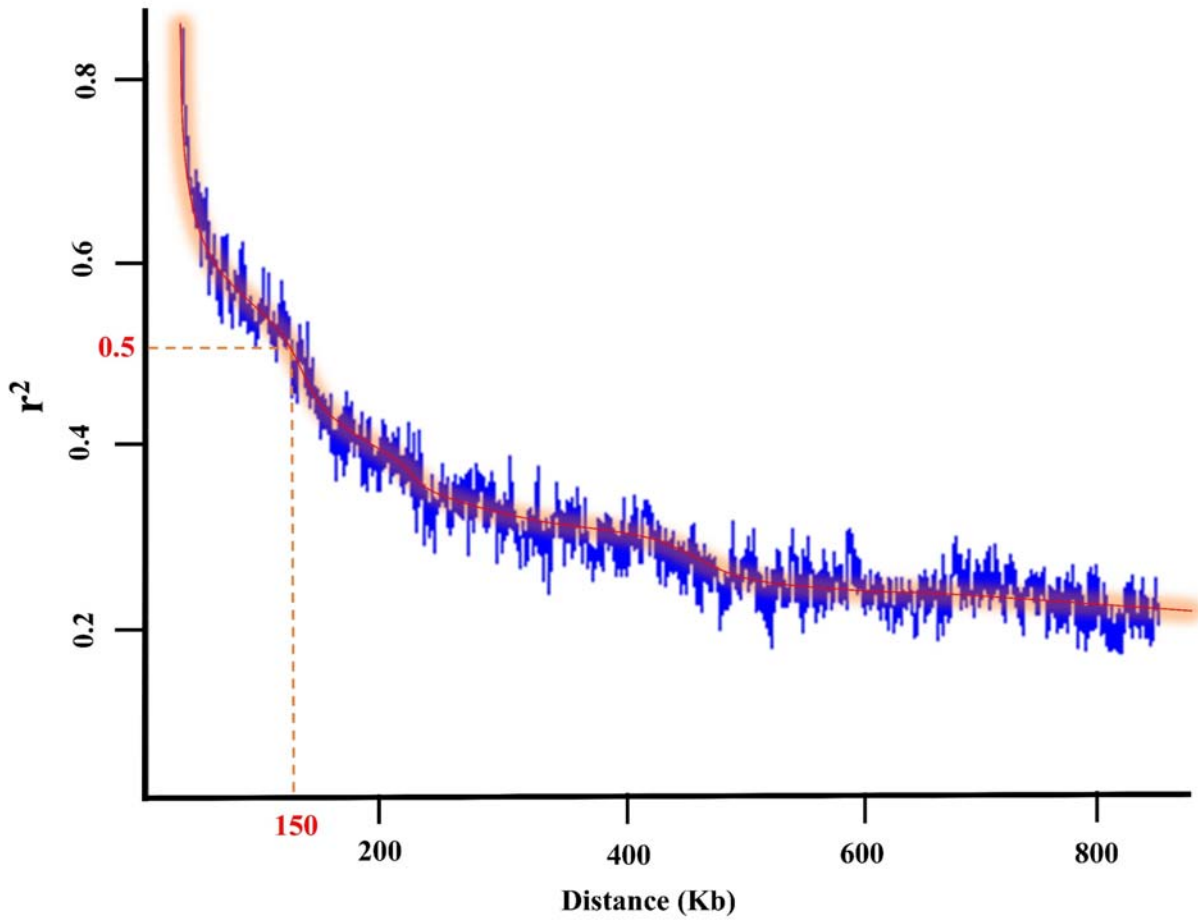

**Fig. 1** LD decay distance in the tested 227 soybean genotypes

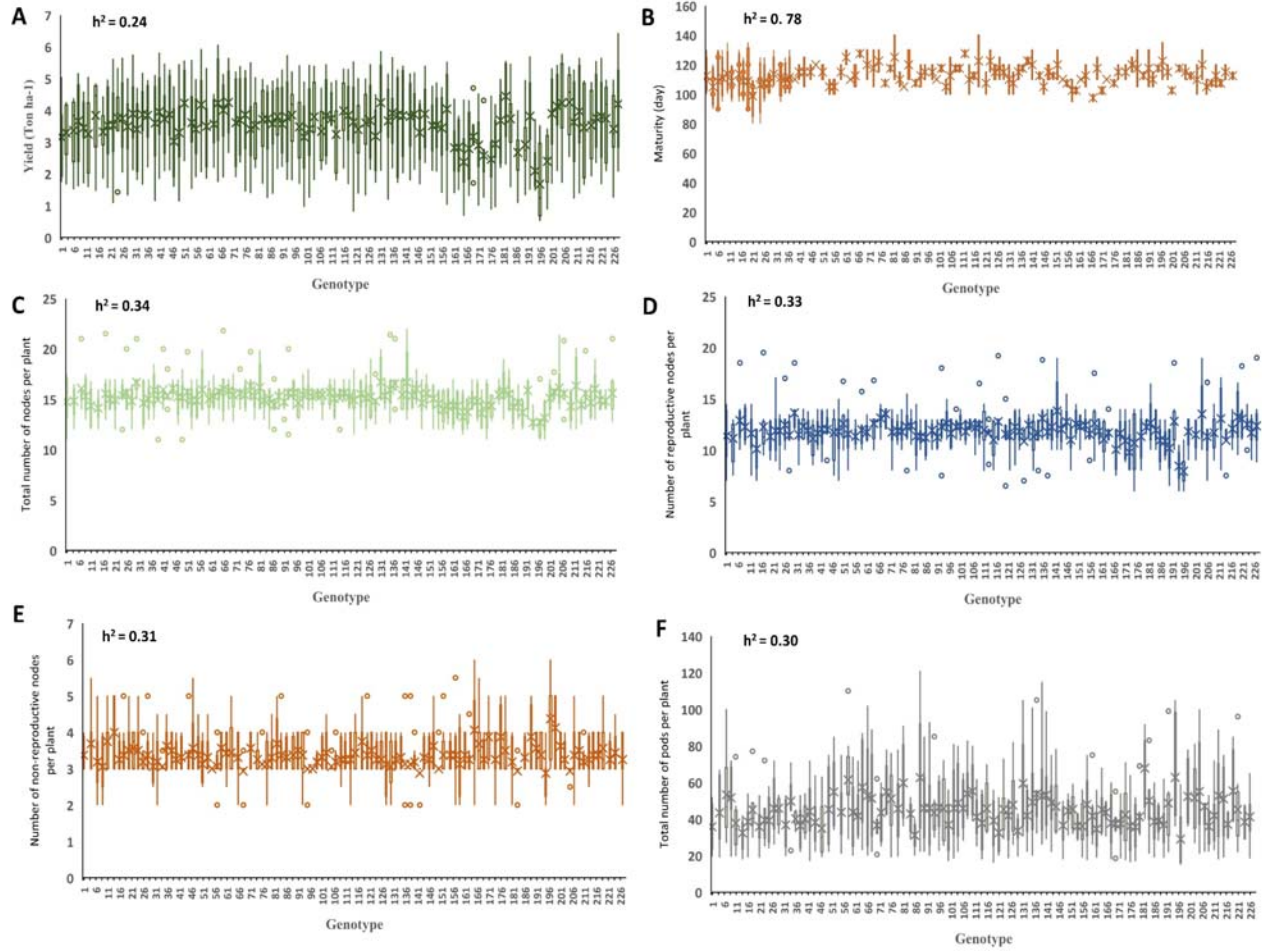

**Fig. 2** The distribution of seed yield (A), maturity (B), NP (C), NRNP (D), RNP (E), and PP (F) in 227 soybean genotypes across four environments. The estimated heritability is provided for each of the six traits. RNP: Total number of reproductive nodes per plant, NRNP: The total number of non-reproductive nodes per plant, NP: The total nodes per plant, PP: The total number of pods per plant.

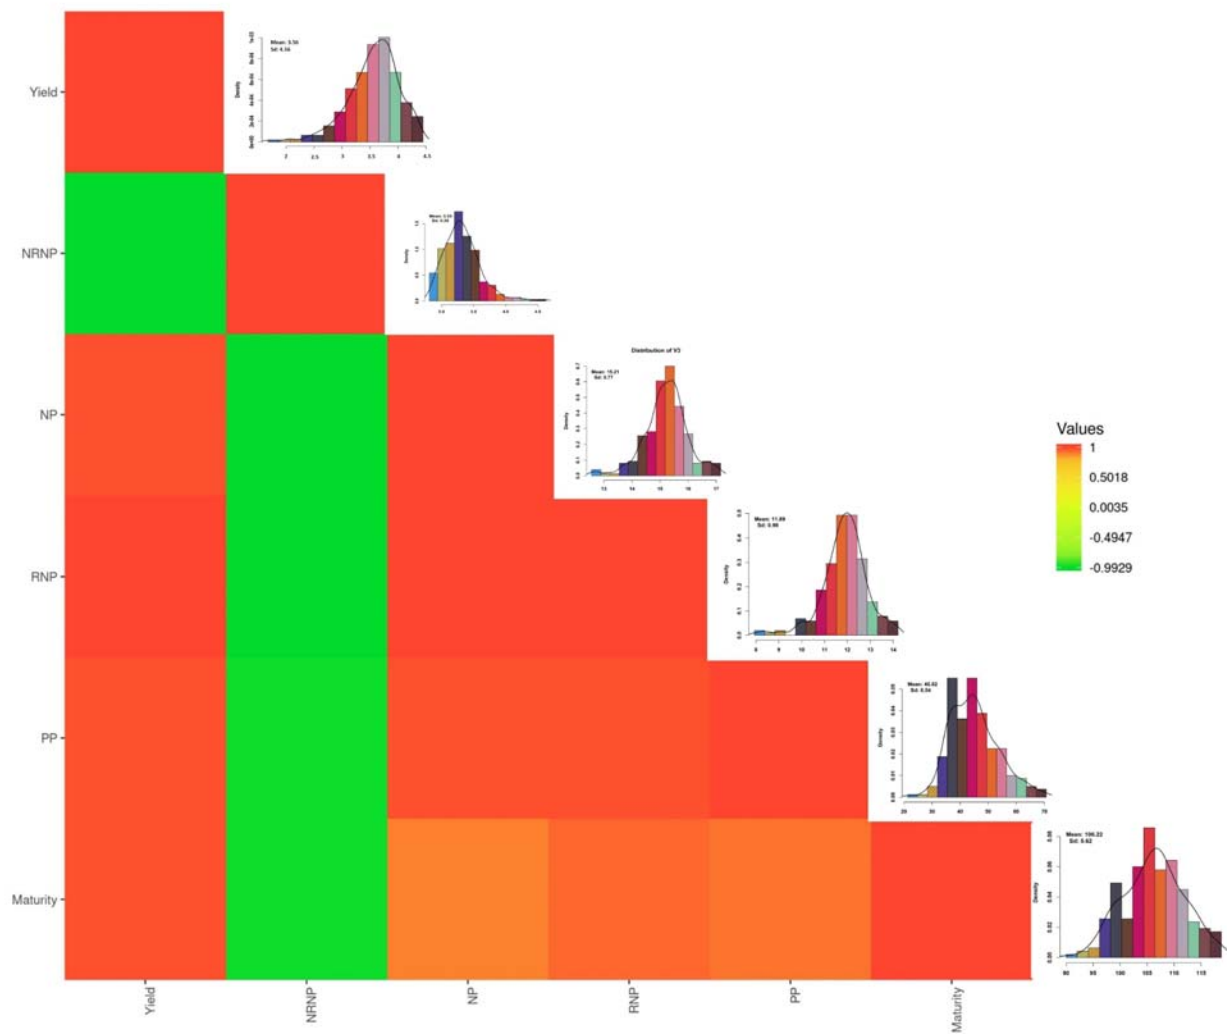

**Fig. 3** The distributions and Pearson correlations among the soybean seed yield, maturity, and yield component traits. RNP: Total number of reproductive nodes per plant, NRNP: The total number of non-reproductive nodes per plant, NP: The total nodes per plant, PP: The total number of pods per plant. The heatmap scale for values is provided by colour for the panel.

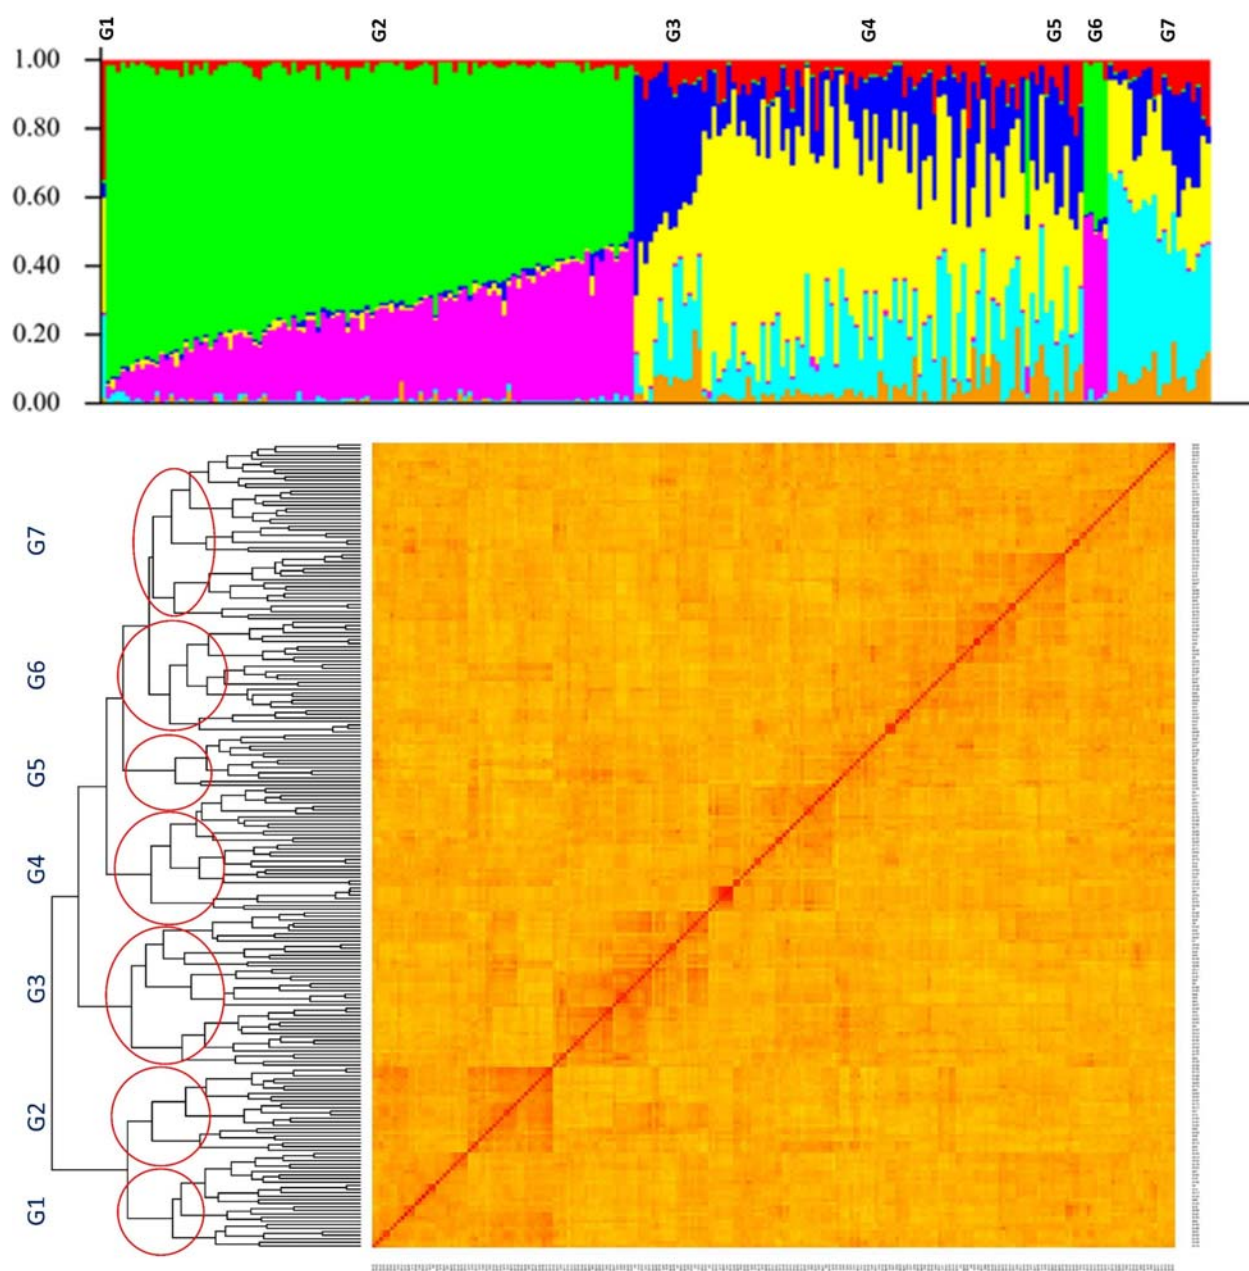

**Fig. 4** Structure and kinship plots for the 227 soybean genotypes. The x-axis is the number of genotypes used in this GWAS panel, and the y axis is the membership of each subgroup. G1-G7 stands for the subpopulation.

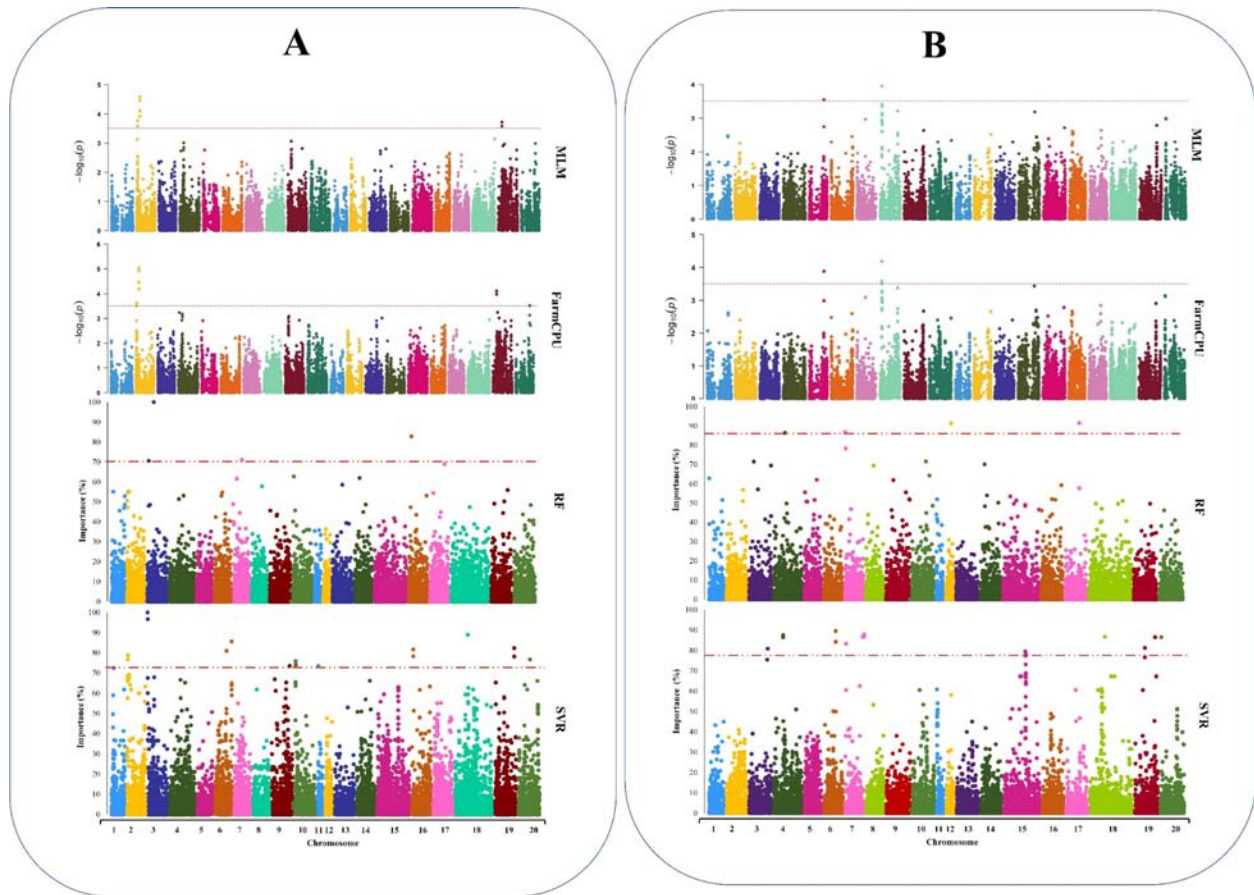

**Fig. 5** Genome-wide Manhatt plots for GWAS studies of A) maturity and B) seed yield in soybean using MLM, FarmCPU, RF, and SVR methods, from top to bottom, respectively.

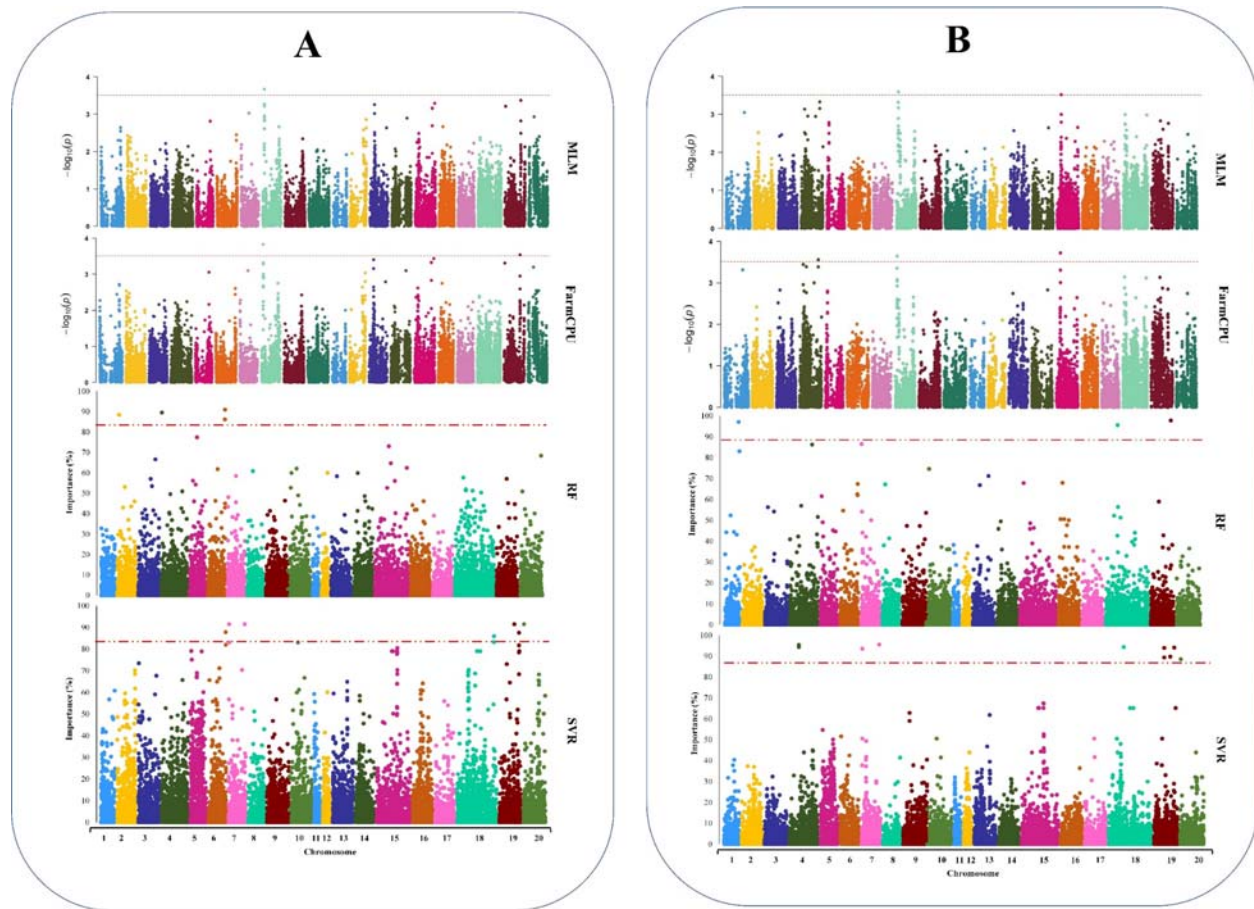

**Fig. 6** Genome-wide Manhattan plots for GWAS studies of A) the total number of nodes (NP) and B) the total number of non-reproductive nodes (NRNP) in soybean using MLM, FarmCPU, RF, and SVR methods, from top to bottom, respectively.

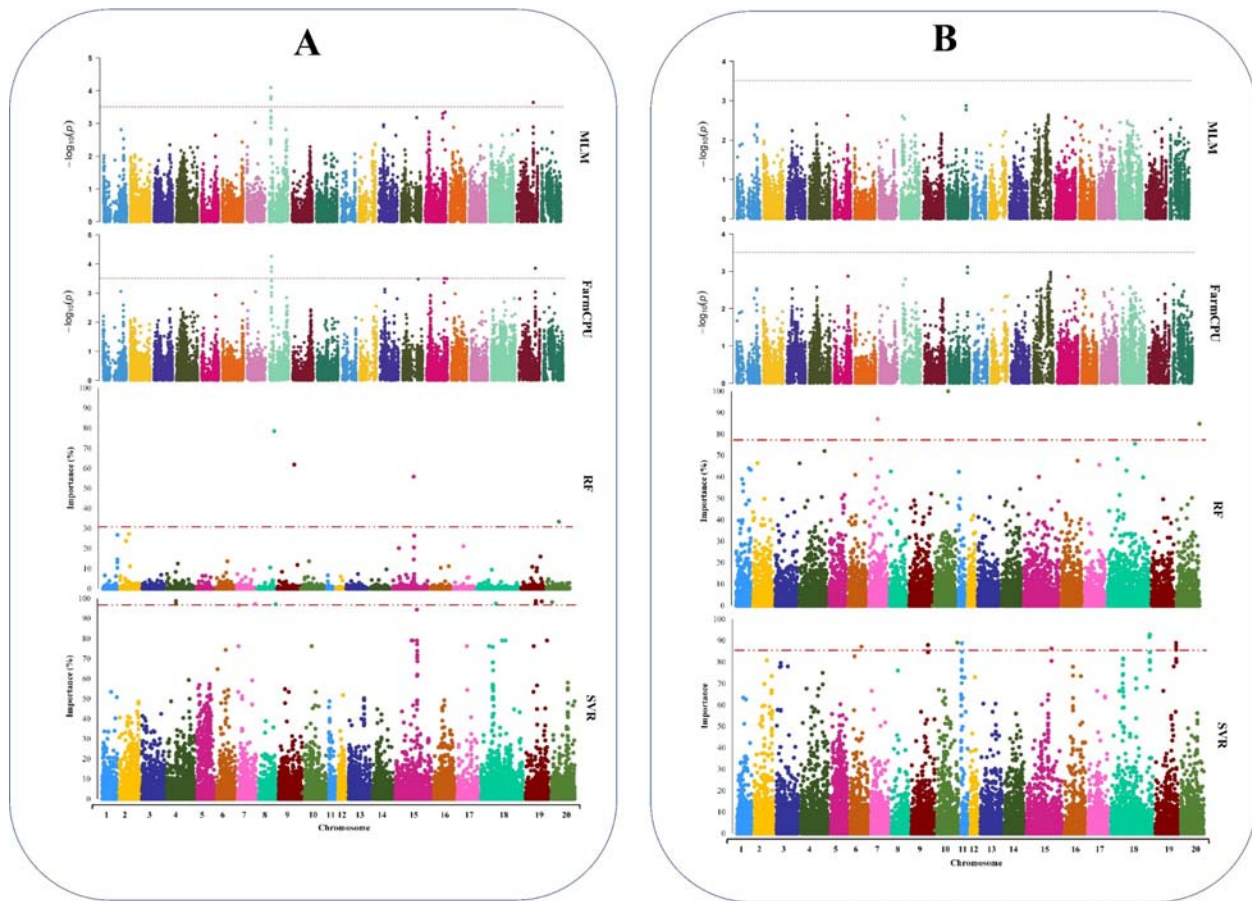

**Fig. 7** Genome-wide Manhattan plots for GWAS studies of A) The total number of reproductive nodes (RNP) and B) the total number of pods (PP) in soybean using MLM, FarmCPU, RF, and SVR methods, from top to bottom, respectively.

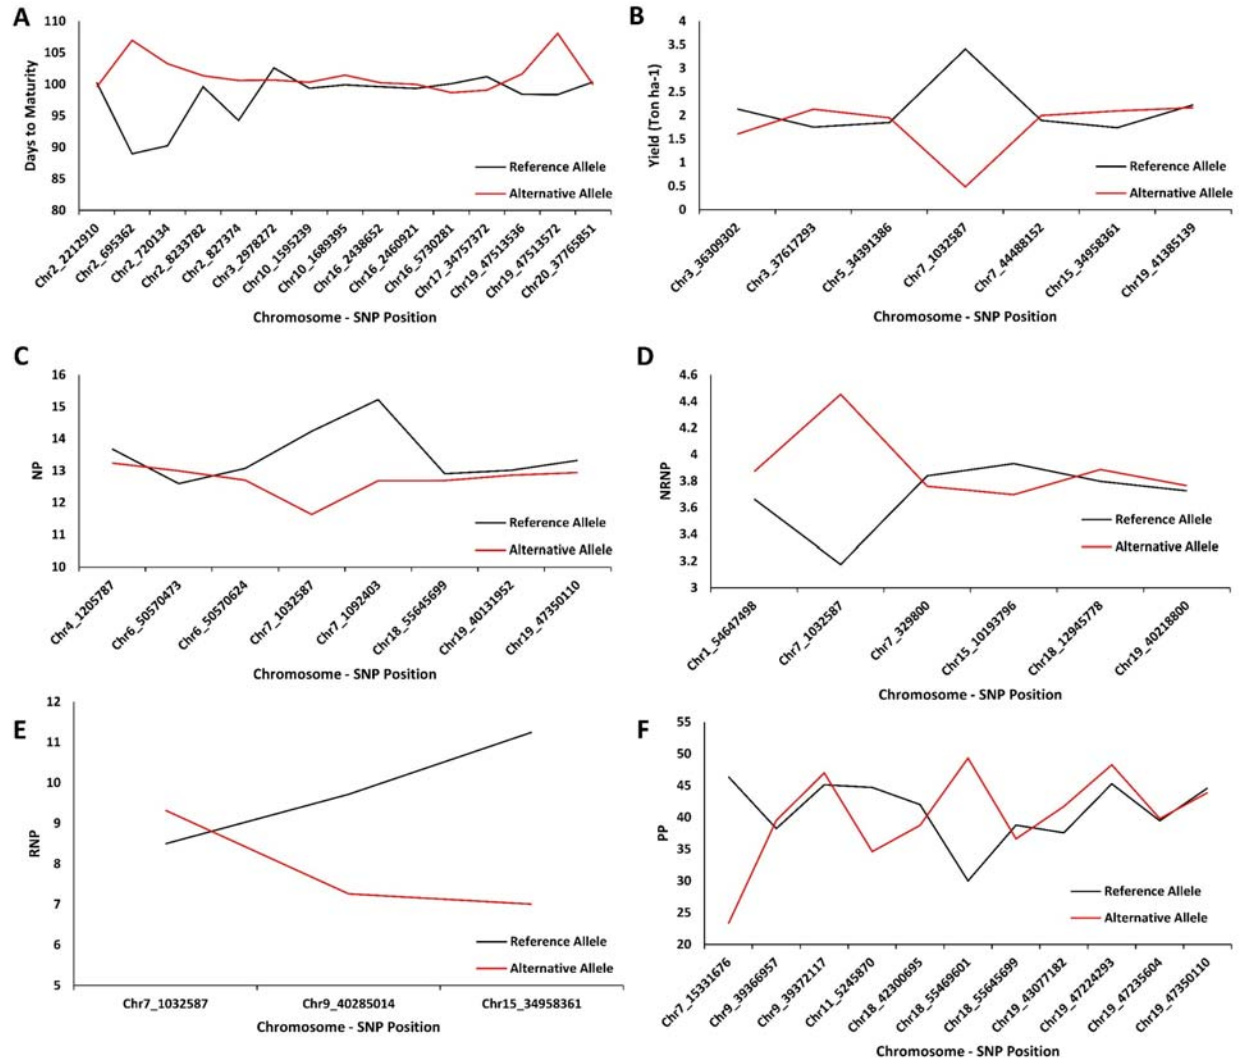

**Fig. 8** The average effects of reference allele and alternative allele from the detected SNP's peak for seed yield (A), maturity (B), NP (C), NRNP (D), RNP (E), and PP (F) in 227 soybean genotypes across four environments. RNP: Total number of reproductive nodes per plant, NRNP: The total number of non-reproductive nodes per plant, NP: The total nodes per plant, PP: The total number of pods per plant
